# Supplementary material for: Single-Crystal X-ray Diffraction Study of [c2] Daisy Chains and Inclusion Complexes from A1/A2-Functionalized Pillar[5]arenes with Variable Chain Lengths
Source: Research Square preprint supplement (doi:10.21203/rs.3.rs-8298205/v1), 2026-02-02
Supplement: Supplementary file 1 [file 253498748b31822589301000.docx]

**Single Crystal X-ray Diffraction Study of [c2] Daisy Chains and Inclusion Complexes from A1/A2-Functionalized Pillar[5]arenes with Varying Chain Lengths**

**Anshel Saldanha, Mickey Vinodh Fatemeh H Alipour, Rajani Krishnapillai, Nisha Manoj and Talal F. Al-Azemi**

*Chemistry Department, Kuwait University, P.O. Box 5969, Safat 13060, Kuwait.*

**Table of contents**

| **Table S1** Summary of the key crystallographic parameters of **P8_D** & **P10_D** | S2 |
| --- | --- |
| **Table S2** Summary of the key crystallographic parameters of **P8.ADN** & **P10.ADN** | S3 |
| **Fig. S1** Thermal ellipsoid representation the asymmetric unit of **P8_D** | S4 |
| **Fig. S2** Thermal ellipsoid representation the asymmetric unit of **P10_D** | S5 |
| **Fig.** Thermal ellipsoid representation the asymmetric unit of **P8.ADN** | S6 |
| **Fig. S4** Thermal ellipsoid representation the asymmetric unit of **P10.ADN** | S7 |
| **Fig. S5** Possible intermolecular interactions between **P10_D** dimeric systems in crystal network with adjacent pillar[5]arene dimers | S8 |
| **Fig. S6** Hirshfeld surfaces (mapped with dnorm) of the **P8.ADN** and **P10.ADN** crystals. | S9 |
| **Fig. S7** Packing pattern of **P8_D** and **P10_D** crystals. | S10 |
| **Fig. S8** Packing pattern of **P8.ADN** and **P10.ADN** crystals. | S11 |
| **checkCif report of P8_D** | S12 |
| **checkCif report of P10_D** | S15 |
| **checkCif report of P8.ADN** | S18 |
| **checkCif report of P10.ADN** | S21 |

**Table S1.** Summary of the key crystallographic parameters of **P8_D** & **P10_D**

| Crystal sample | **P8_D** | **P10_D** |
| --- | --- | --- |
| Chemical formula | C111H131Cl9O20 | C62H80O10 |
| Mr | 2104.20 | 985.26 |
| Crystal system, space group | Monoclinic, *C*2/*c* | Monoclinic, *P*21/*c* |
| Temperature (K) | 293 | 293 |
| a, b, c (Å) | 39.539 (4), 12.6249 (12), 22.946 (2) | 21.690 (2), 12.8951 (14), 22.960 (2) |
| α, β, γ (°) | 90, 108.114 (8), 90 | 90, 116.539 (8), 90 |
| V (Å3) | 10886.3 (19) | 5745.2 (11) |
| Z | 4 | 4 |
| Radiation type | Mo Kα | Mo Kα |
| µ (mm−1) | 0.30 | 0.08 |
| Crystal size (mm) | 0.22 × 0.06 × 0.03 | 0.21 × 0.09 × 0.03 |
| Diffractometer | Rigaku R-AXIS RAPID | Rigaku R-AXIS RAPID |
| Absorption correction | Multi-scan  ABSCOR (Rigaku, 1995) | Absorption correction  ABSCOR (Rigaku, 1995) |
| Tmin, Tmax | 0.267, 0.990 | 0.178, 0.998 |
| No. of measured, independent & observed [I > 2σ(I)] reflections | 34210, 9287, 3680 | 37991, 10045, 3132 |
| Rint | 0.119 | 0.150 |
| (sin θ/λ)max (Å−1) | 0.590 | 0.594 |
| R[F2 > 2σ(F2)], wR(F2), S | 0.113, 0.342, 1.23 | 0.110, 0.331, 1.08 |
| No. of reflections | 9287 | 10045 |
| No. of parameters | 652 | 656 |
| No. of restraints | 114 | 101 |
| H-atom treatment | Mixed | Constrained |
| Δρmax, Δρmin (e Å−3) | 0.88, −0.59 | 0.41, −0.31 |

**Table S2** Summary of the key crystallographic parameters of **P8.ADN** & **P10.ADN**

| Crystal sample | **P8_ADN** | **P10_ADN** |
| --- | --- | --- |
| Chemical formula | C60H72N2O10 | C62H76N2O10 |
| Mr | 981.19 | 1009.24 |
| Crystal system, space group | Monoclinic, P21/n | Triclinic, P-1 |
| Temperature (K) | 293 | 293 |
| a, b, c (Å) | 12.1153(6), 12.4294(7), 37.2417 (19) | 11.2701(12), 12.0419(13), 24.328 (3) |
| α, β, γ (°) | 90, 90.735 (6), 90 | 76.594 (5), 89.067 (6), 63.961 (5) |
| V (Å3) | 5607.6 (5) | 2871.8 (6) |
| Z | 4 | 2 |
| Radiation type | Mo Kα | Mo Kα |
| µ (mm−1) | 0.08 | 0.08 |
| Crystal size (mm) | 0.20 × 0.20 × 0.04 | 0.20 × 0.06 × 0.04 |
| Diffractometer | Rigaku R-AXIS RAPID | Rigaku R-AXIS RAPID |
| Absorption correction | Multi-scan  ABSCOR (Rigaku, 1995) | Absorption correction  ABSCOR (Rigaku, 1995) |
| Tmin, Tmax | 0.698, 0.982 | 0.149, 0.997 |
| No. of measured, independent & observed [I > 2σ(I)] reflections | 54642, 9866, 4515 | 22097, 9772, 3255 |
| Rint | 0.058 | 0.092 |
| (sin θ/λ)max (Å−1) | 0.595 | 0.595 |
| R[F2 > 2σ(F2)], wR(F2), S | 0.108, 0.342, 0.95 | 0.107, 0.349, 1.04 |
| No. of reflections | 9866 | 9772 |
| No. of parameters | 658 | 676 |
| No. of restraints | 166 | 146 |
| H-atom treatment | Constrained | Constrained |
| Δρmax, Δρmin (e Å−3) | 0.48, −0.53 | 0.40, −0.31 |

**
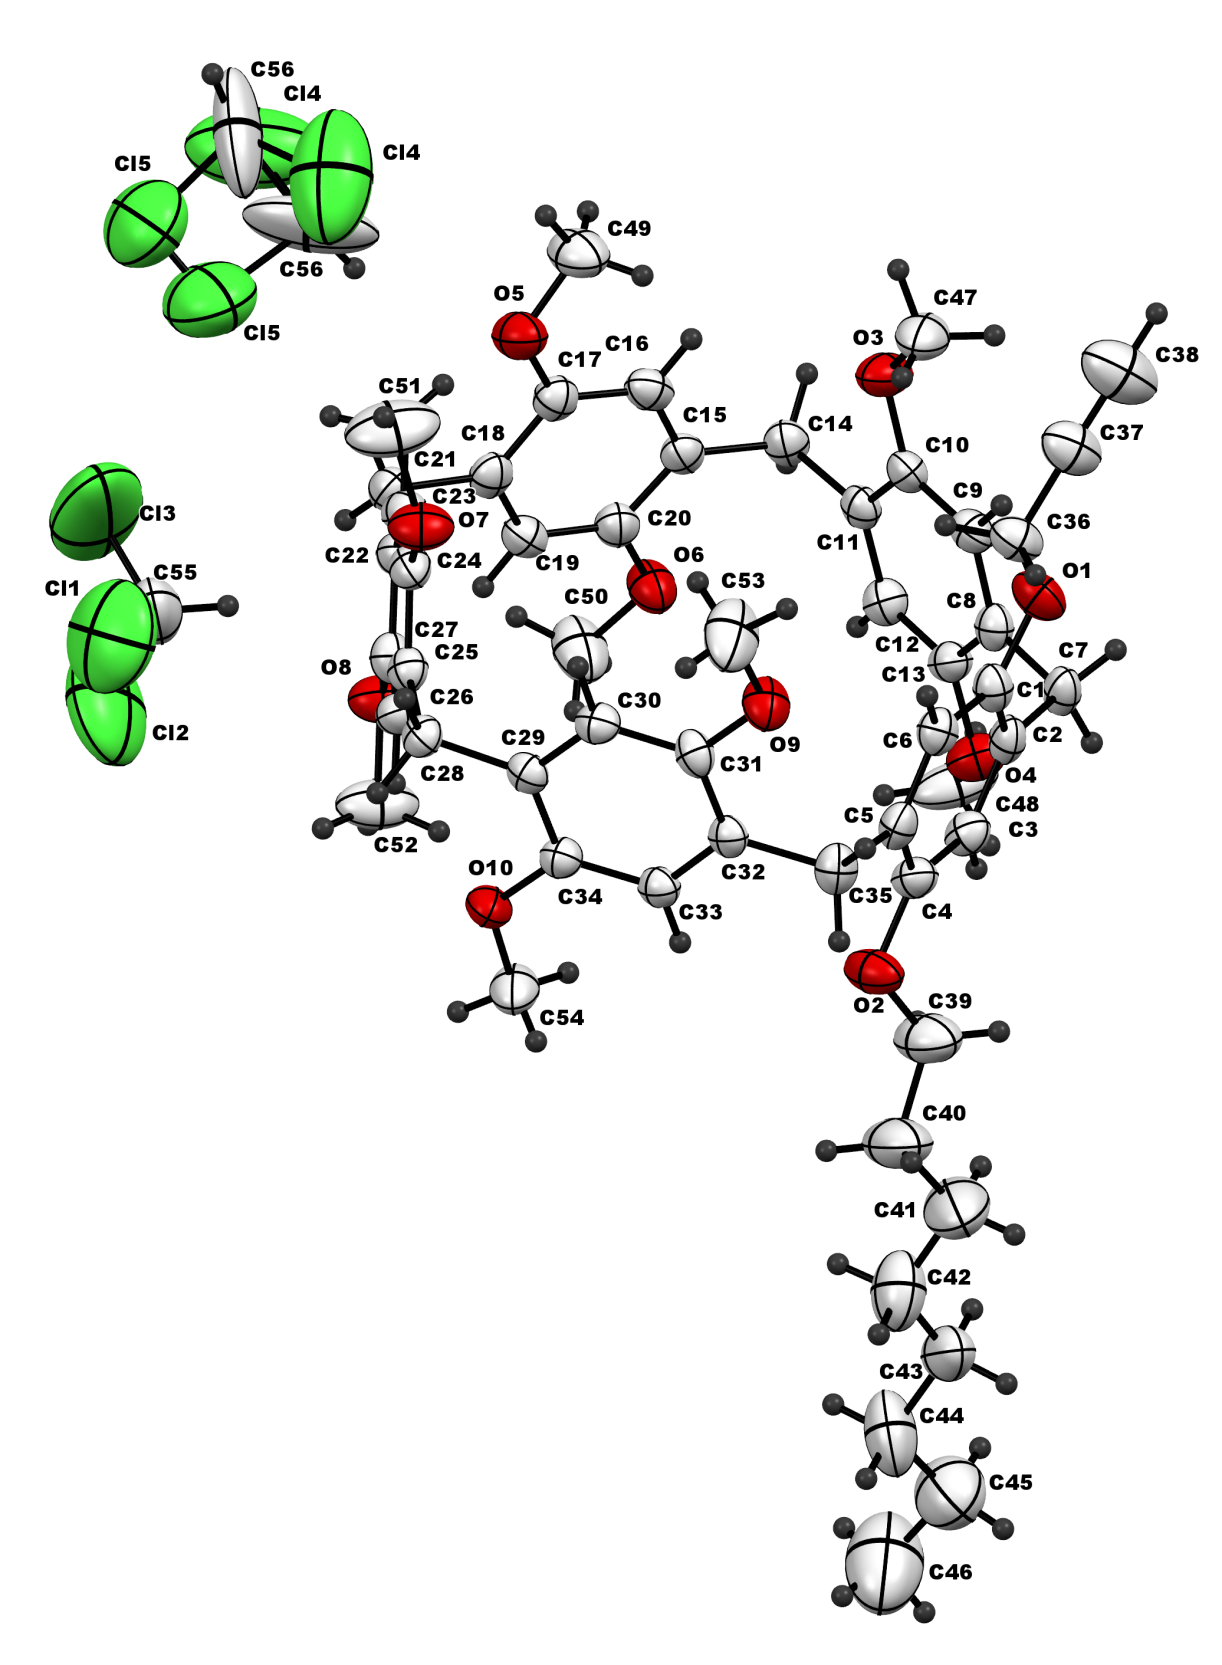
**

**Fig. S1** Thermal ellipsoid representation ( 30% probability) the asymmetric unit of **P8_D**

**
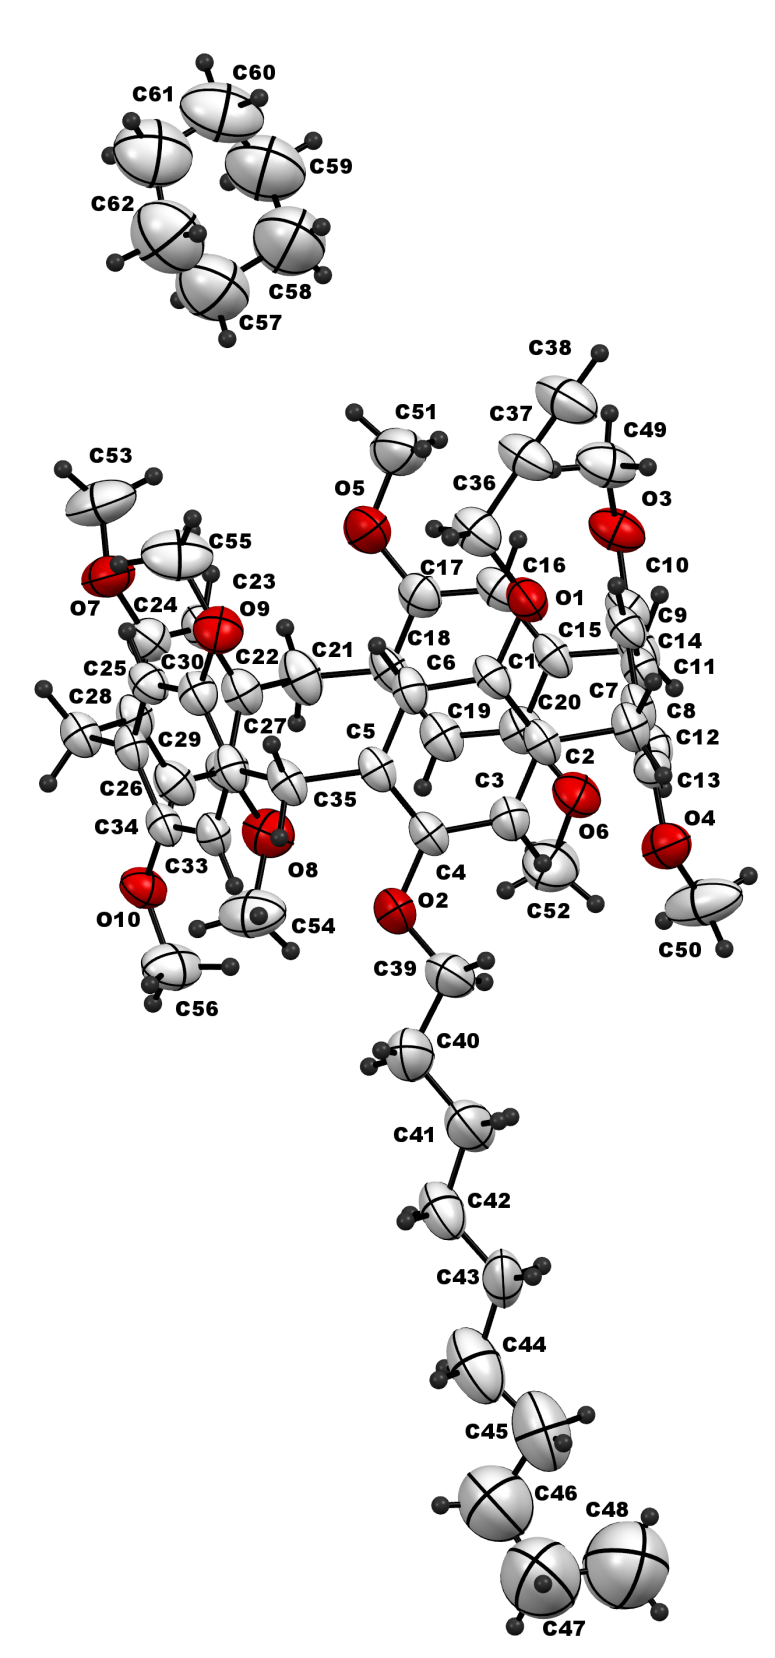
**

**Fig. S2** Thermal ellipsoid representation ( 30% probability) the asymmetric unit of **P10_D**

**
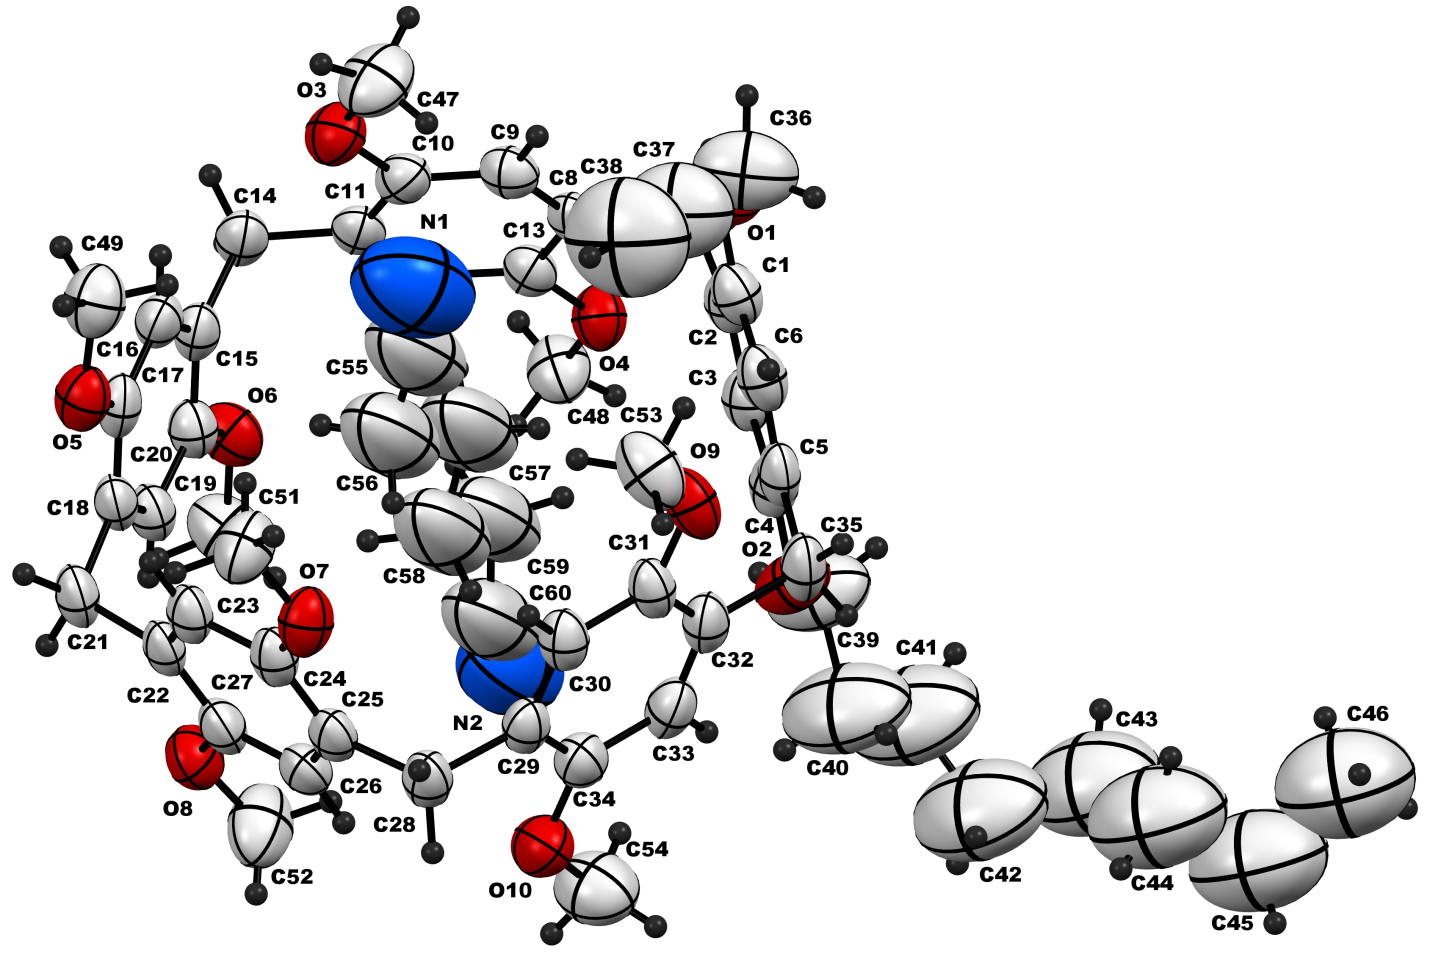
**

**Fig. S3** Thermal ellipsoid representation ( 30% probability) the asymmetric unit of **P8.ADN**

**
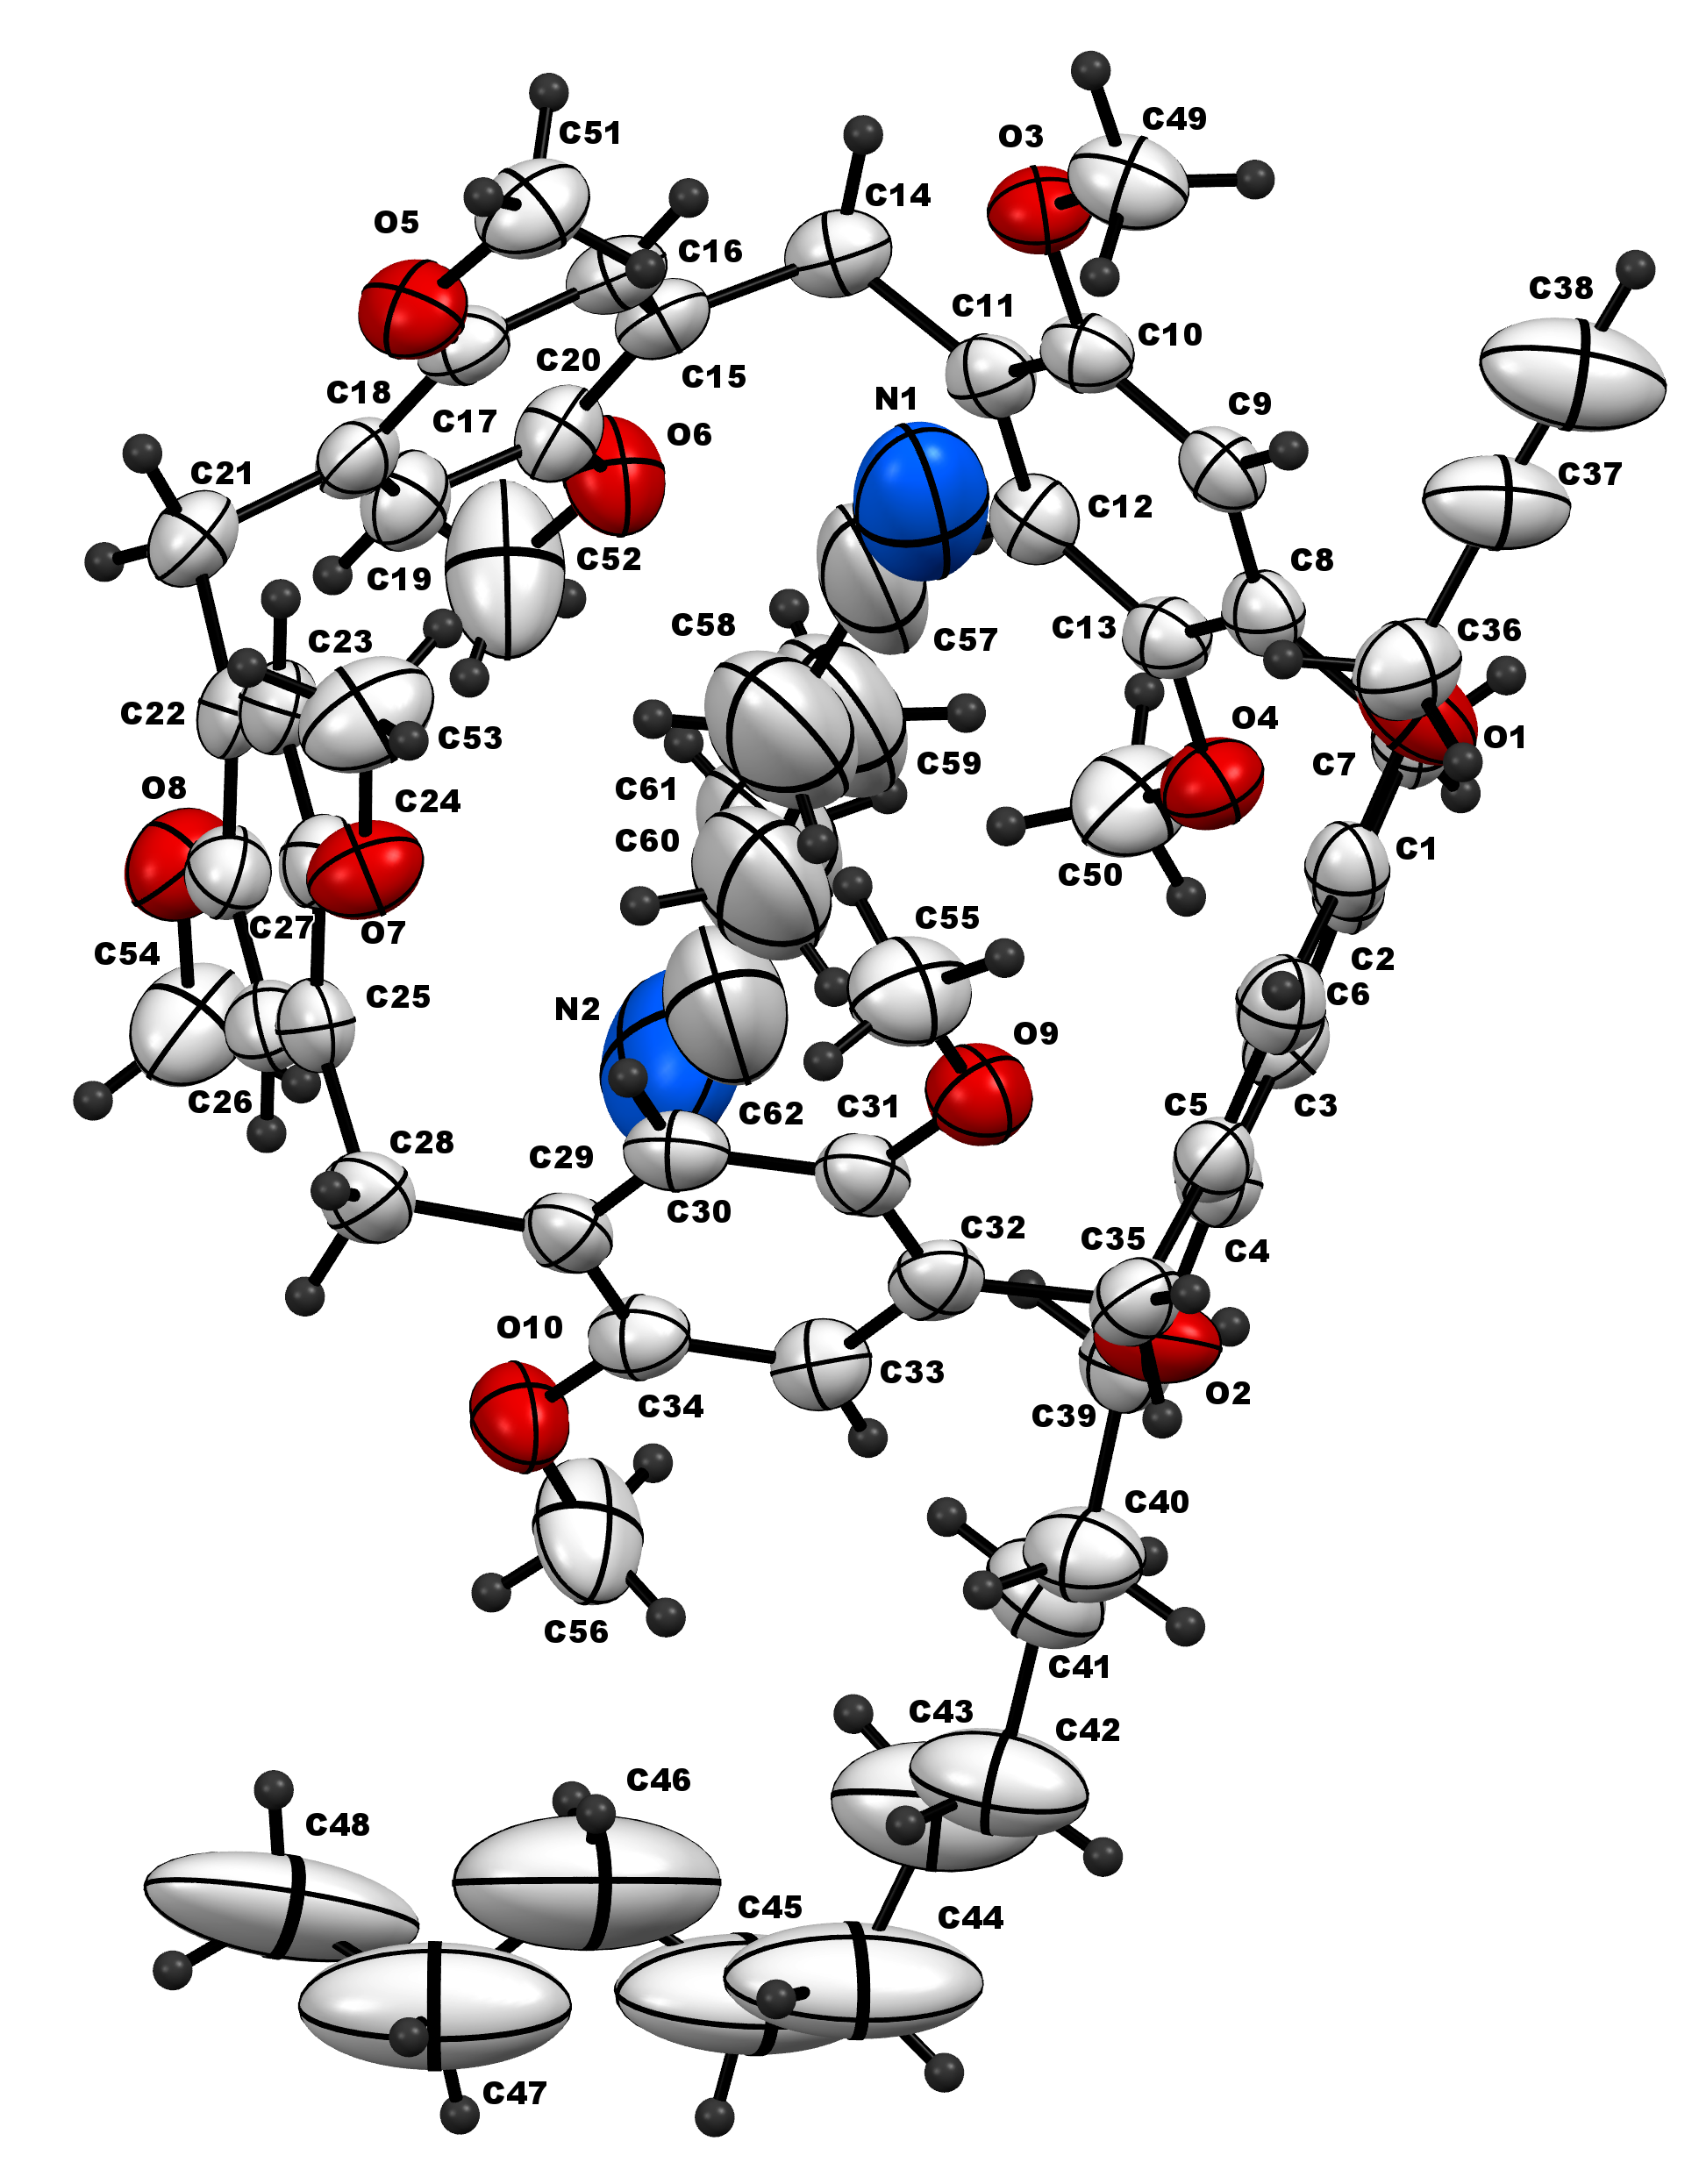
**

**Fig. S4** Thermal ellipsoid representation ( 30% probability) the asymmetric unit of **P10.ADN**

**
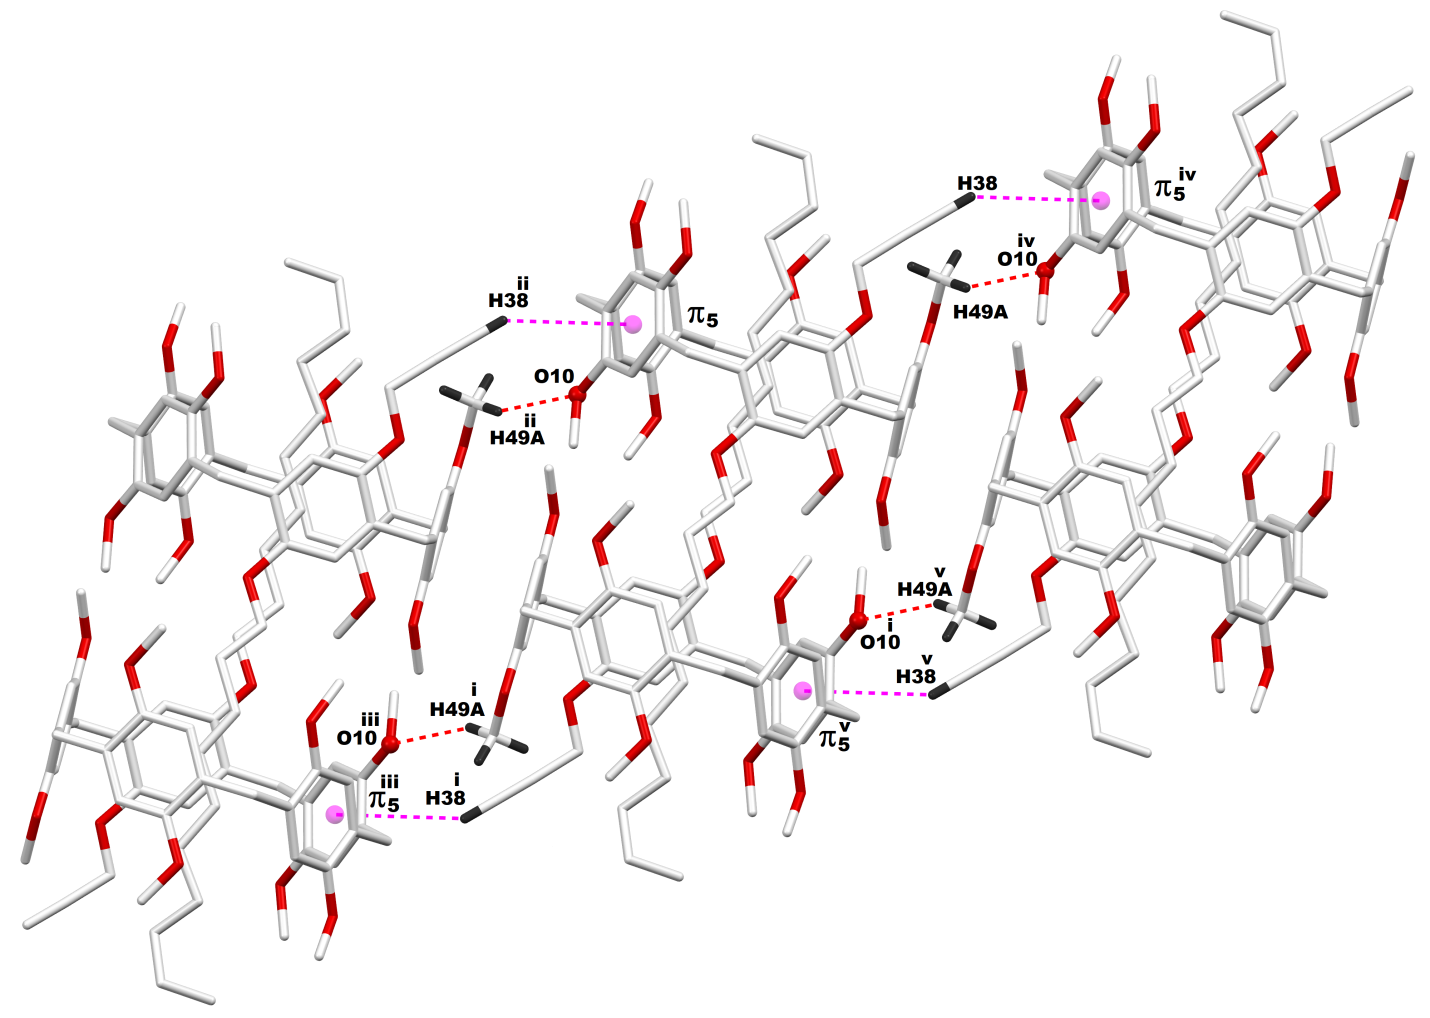
**

**Fig. S5**: Possible intermolecular interactions between **P10_D** dimeric systems in crystal network with adjacent pillar[5]arene dimers of different symmetries. Symmetry code: (i) 2-x, 2-y, 2-z; (ii) x, -1+y,z; (iii) 2-x, 1-y, 2-z; (iv) x, 1+y, z & (v) 2-x, 3-y,2-z; π5 is the centroid of the phenyl ring constituting C29-C34.

**
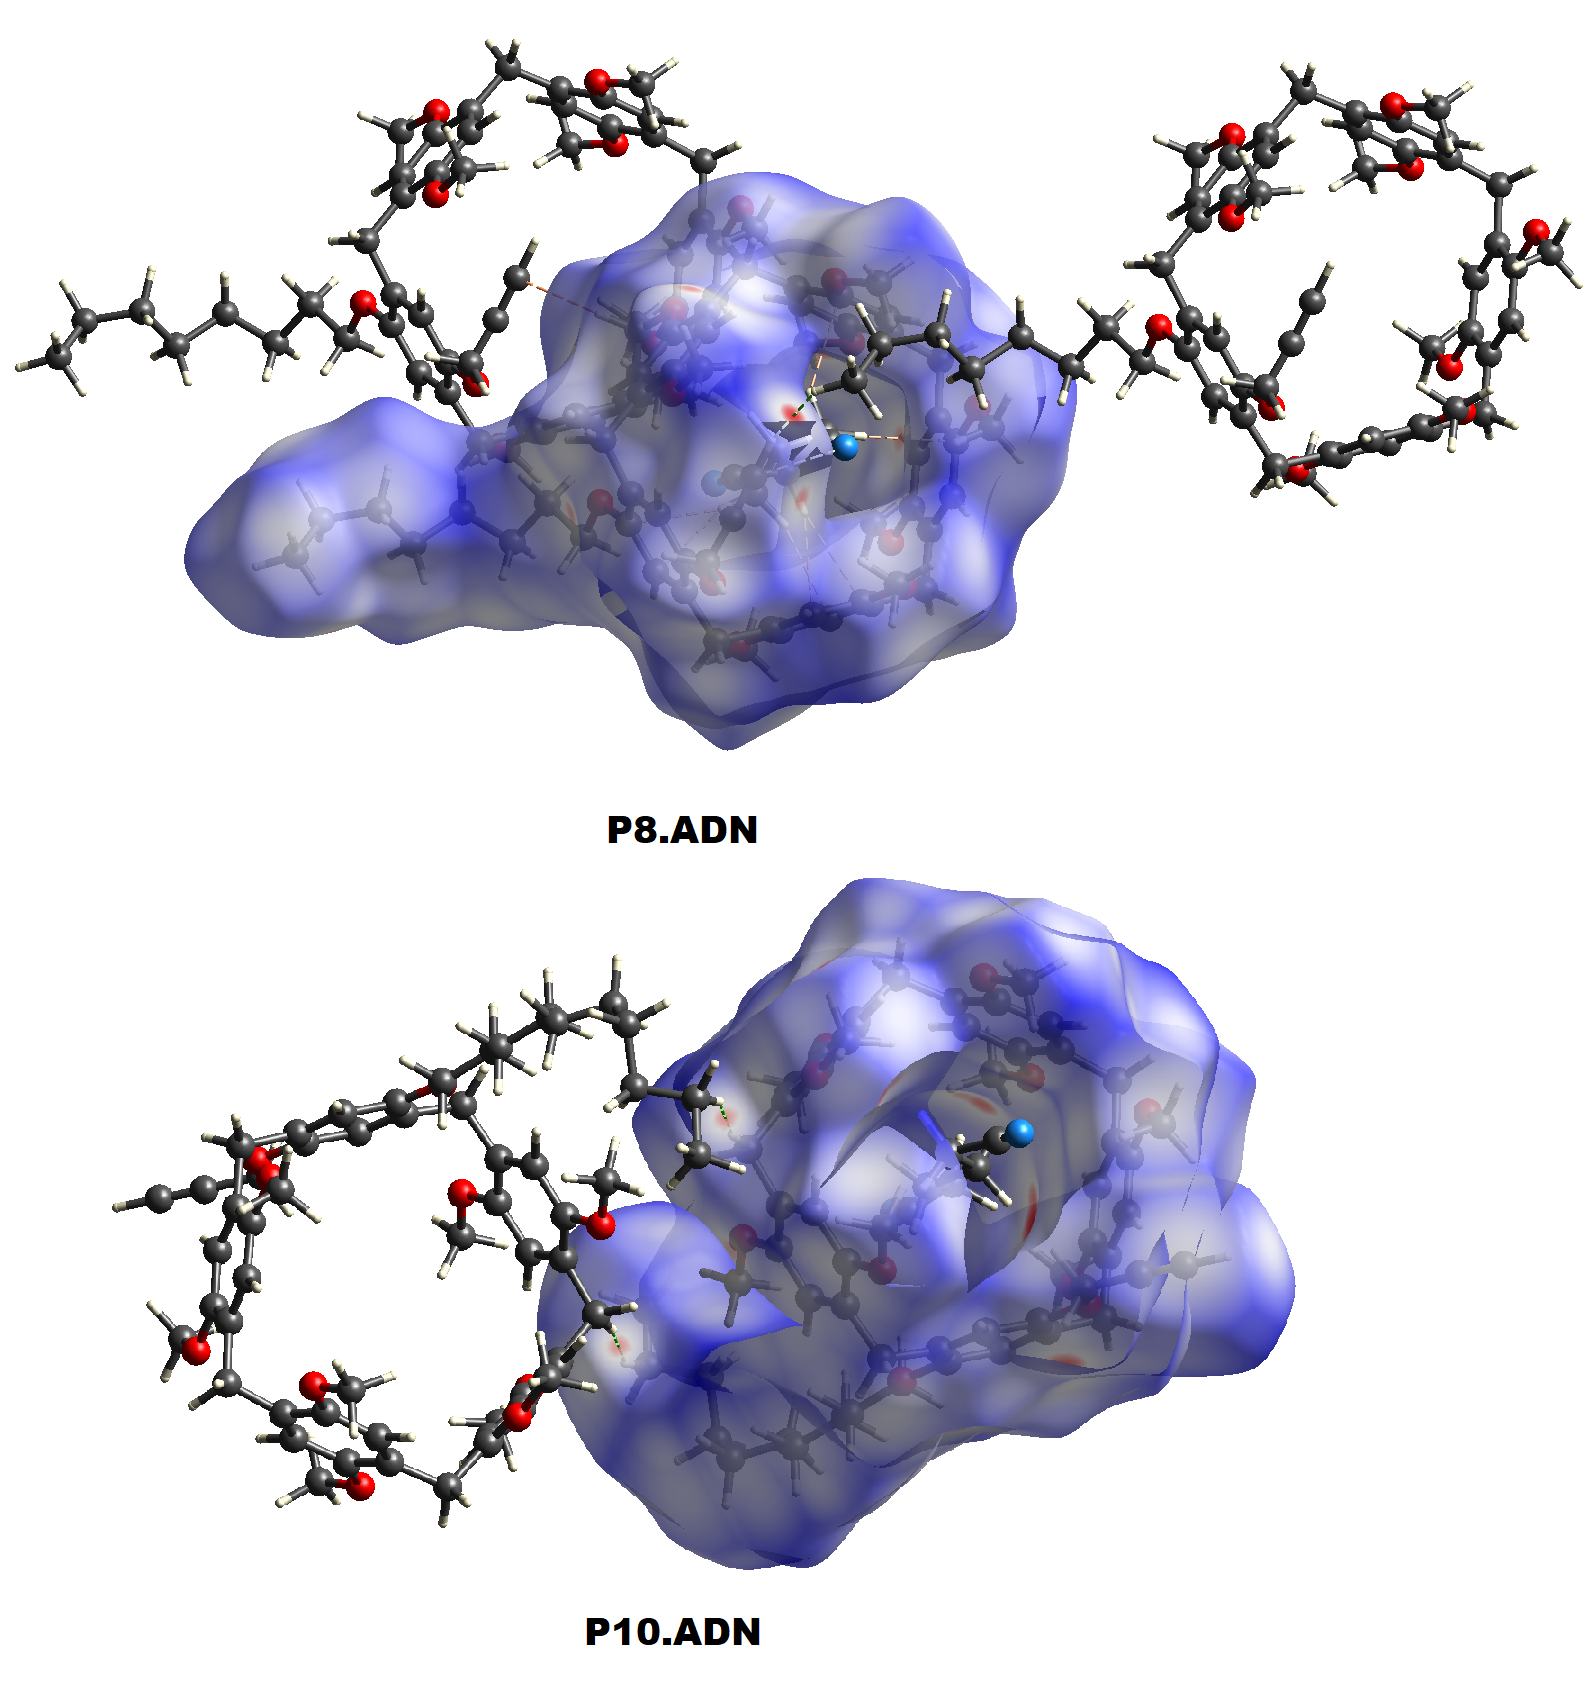
**

**Fig. S6.** Hirshfeld surfaces (mapped with dnorm) of the **P8.ADN** and **P10.ADN** crystals.

**
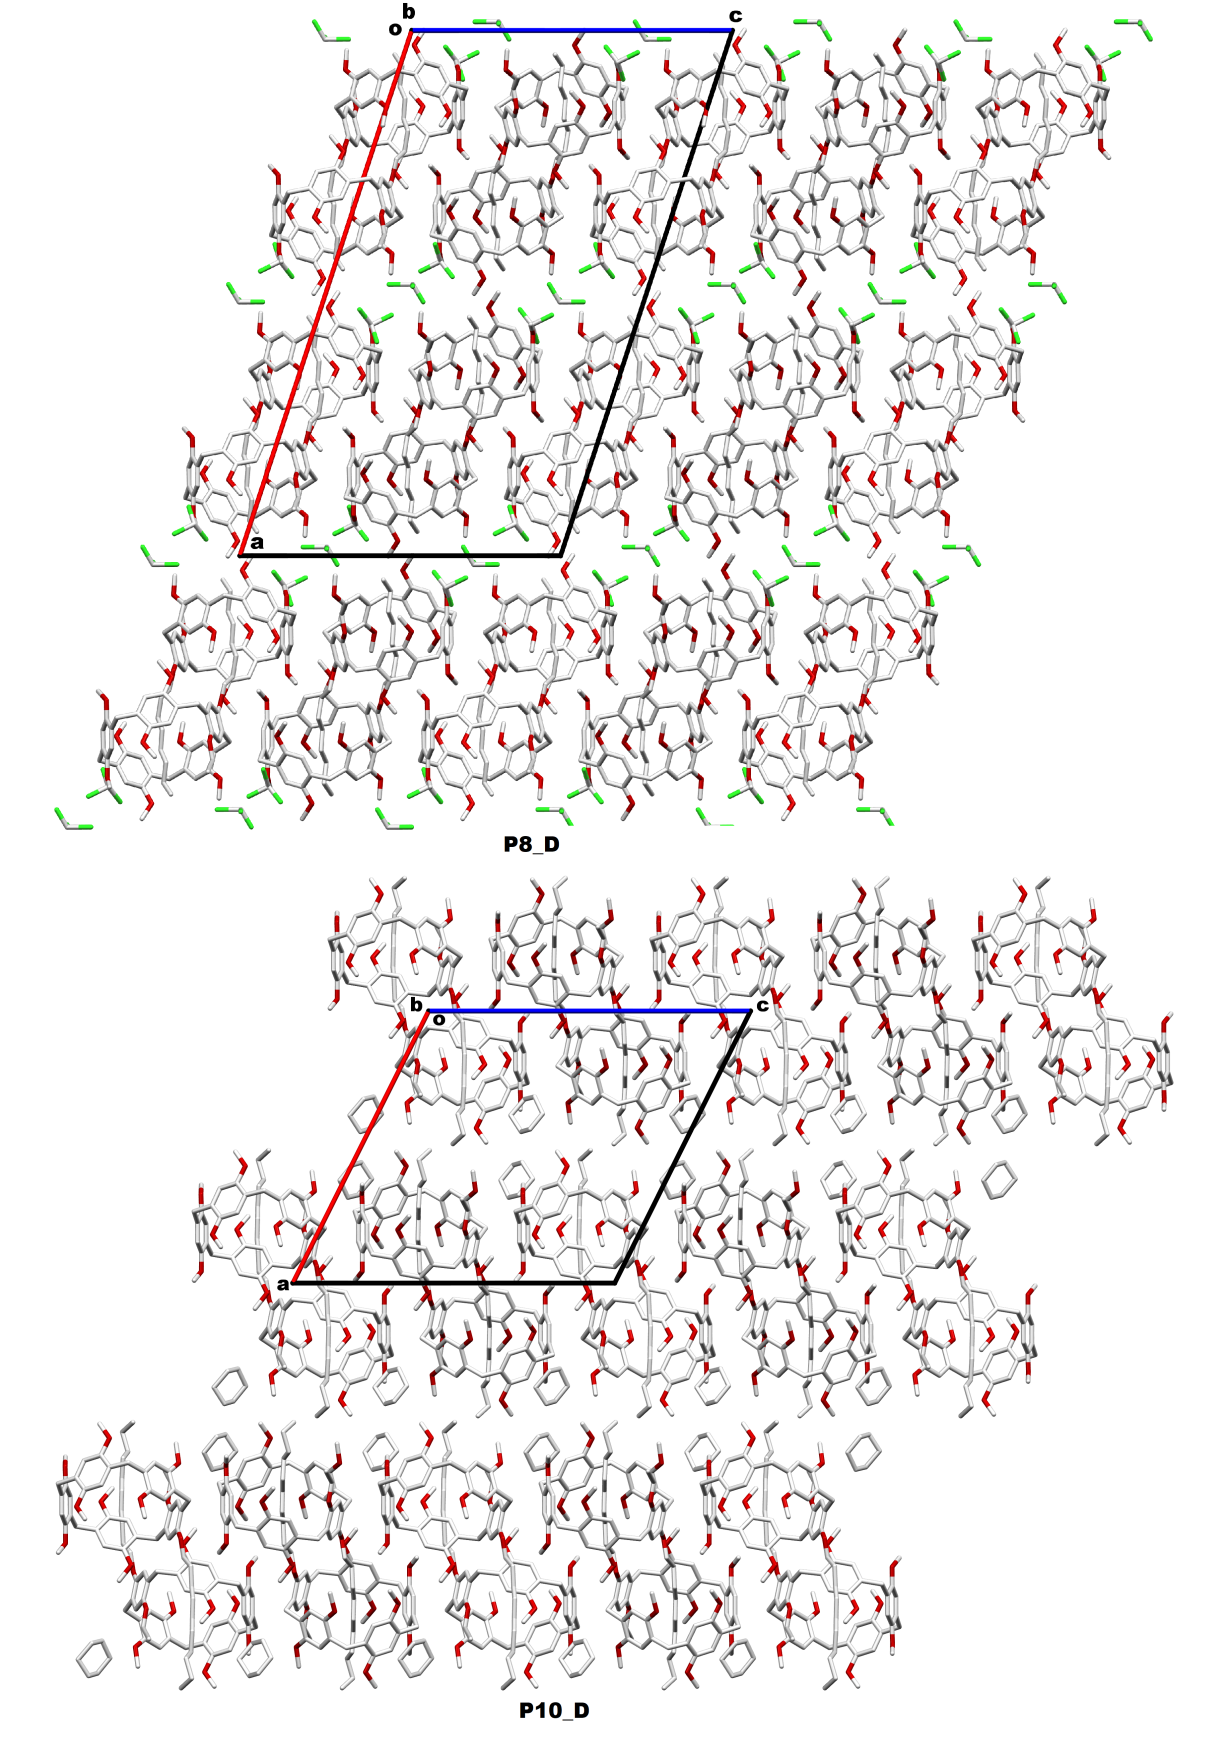
**

**Fig. S7**. Packing pattern of **P8_D** and **P10_D** crystals.

**
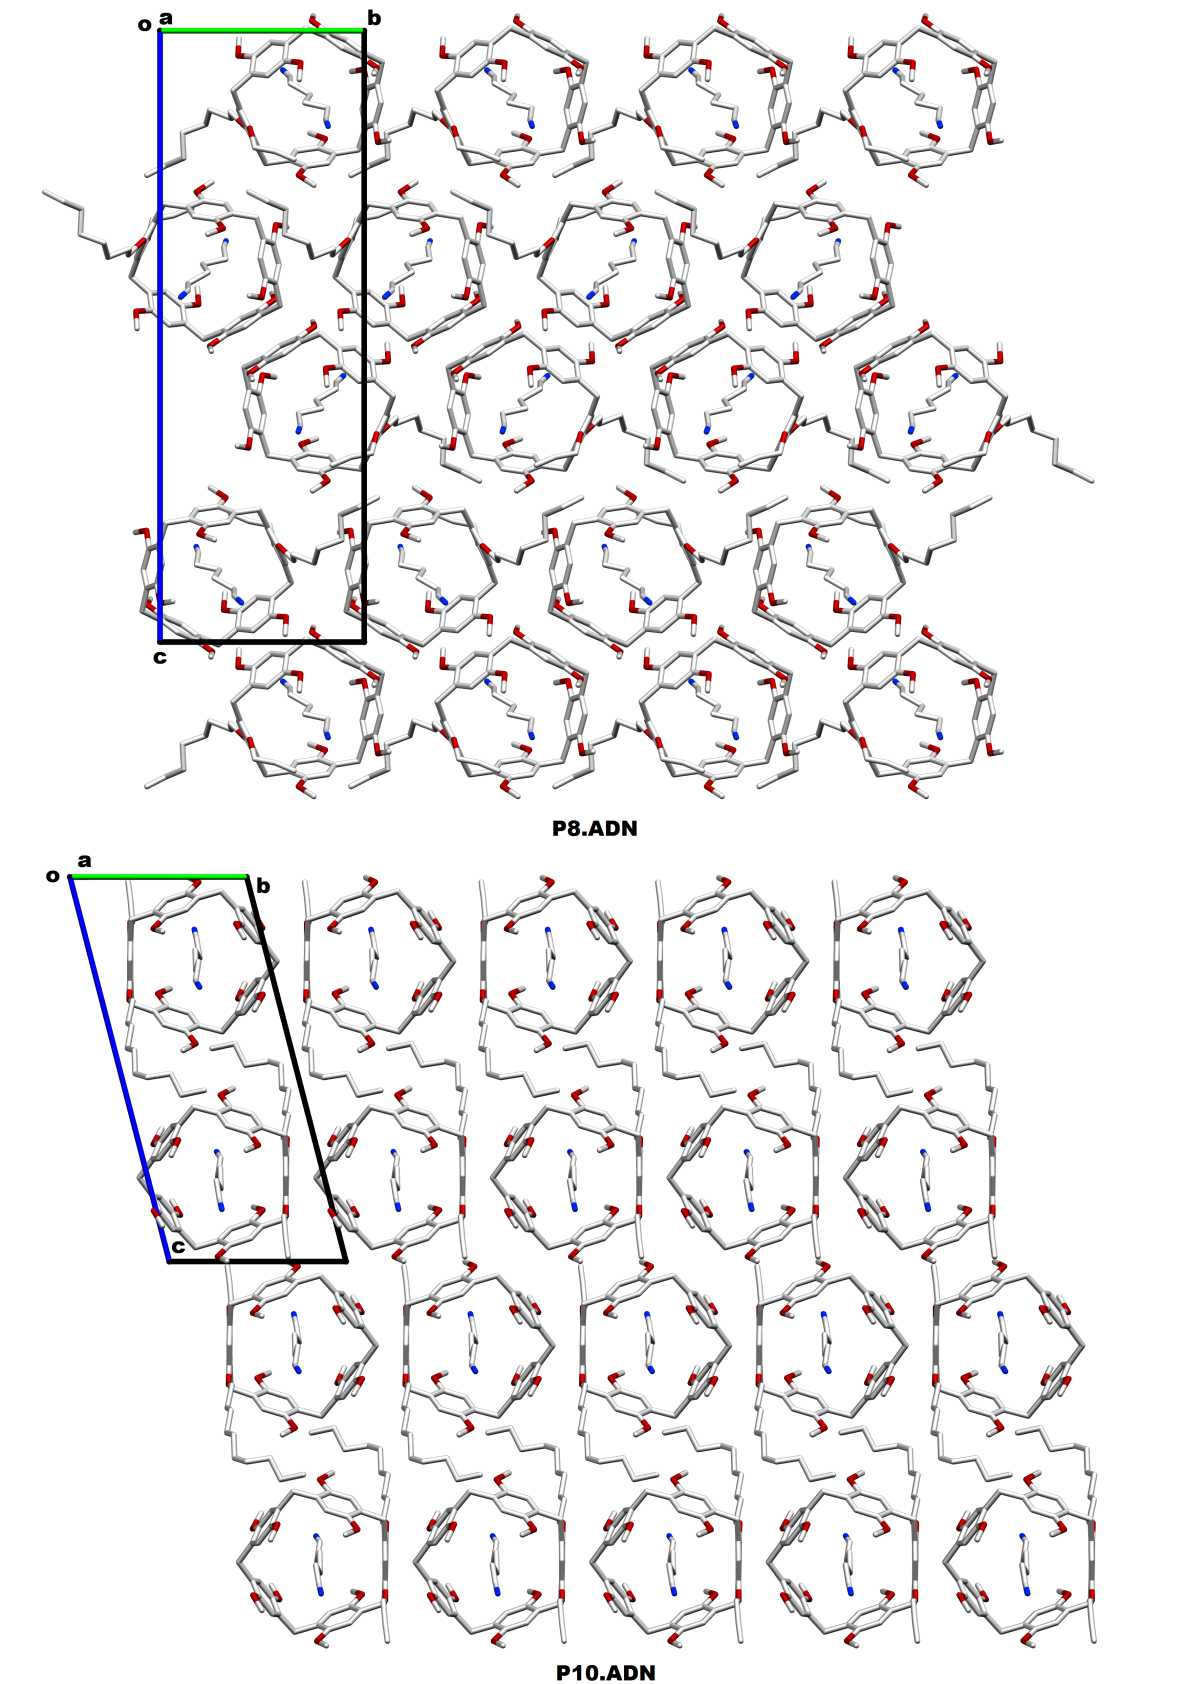
**

**Fig. S8.** Packing pattern of **P8.ADN** and **P10.ADN** crystals.

**checkCIF_ P8_D**

heckCIF (basic structural check) running

*Checking for embedded fcf data in CIF ...*
*Found embedded fcf data in CIF. Extracting fcf data from uploaded CIF, please wait*. . . .

checkCIF/PLATON (basic structural check)

Structure factors have been supplied for datablock(s) P8_D

THIS REPORT IS FOR GUIDANCE ONLY. IF USED AS PART OF A REVIEW PROCEDURE FOR PUBLICATION, IT SHOULD NOT REPLACE THE EXPERTISE OF AN EXPERIENCED CRYSTALLOGRAPHIC REFEREE.

No syntax errors found.

[CIF dictionary](https://www.iucr.org/iucr-top/cif/cif_core/definitions/index.html) Please wait while processing .... [Interpreting this report](https://journals.iucr.org/services/cif/checking/checkcifreport.html) [Structure factor report](https://checkcif.iucr.org/qRR2NES2wFkyy/100725194335251314844/ckf.html)

Datablock: P8_D

| Bond precision: | C-C = 0.0106 A | Wavelength=0.71075 |
| --- | --- | --- |

| Cell: | a=39.539(4) | b=12.6249(12) | c=22.946(2) |
| --- | --- | --- | --- |
|  | alpha=90 | beta=108.114(8) | gamma=90 |
| Temperature: | 293 K |  |  |

|  | Calculated | Reported |
| --- | --- | --- |
| Volume | 10886.4(19) | 10886.3(19) |
| Space group | C 2/c | C 2/c |
| Hall group | -C 2yc | -C 2yc |
| Moiety formula | 2(C54 H64 O10), 3(C H Cl3) | ? |
| Sum formula | C111 H131 Cl9 O20 | C111 H131 Cl9 O20 |
| Mr | 2104.21 | 2104.20 |
| Dx,g cm-3 | 1.284 | 1.284 |
| Z | 4 | 4 |
| Mu (mm-1) | 0.298 | 0.298 |
| F000 | 4440.0 | 4440.0 |
| F000' | 4447.25 |  |
| h,k,lmax | 46,14,27 | 46,14,26 |
| Nref | 9394 | 9287 |
| Tmin,Tmax | 0.979,0.991 | 0.267,0.990 |
| Tmin' | 0.937 |  |

| Correction method= # Reported T Limits: Tmin=0.267 Tmax=0.990 AbsCorr = MULTI-SCAN |  |
| --- | --- |

| Data completeness= 0.989 | Theta(max)= 24.807 |
| --- | --- |

| R(reflections)= 0.1129( 3680) | wR2(reflections)= 0.3424( 9287) |
| --- | --- |
| | S = 1.228 | Npar= 652 | | --- | --- | |  |

The following ALERTS were generated. Each ALERT has the format

test-name_ALERT_alert-type_alert-level.

Click on the hyperlinks for more details of the test.


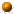
Alert level B

[PLAT260_ALERT_2_B](javascript:makeHelpWindow(%22PLAT260.html%22)) Large Average Ueq of Residue Including Cl1 0.324 Check

**Response:** Due to bad crystal quality, the solvents peaks are not well refined.

[PLAT340_ALERT_3_B](javascript:makeHelpWindow(%22PLAT340.html%22)) Low Bond Precision on C-C Bonds ............... 0.01063 Ang.

**Respnse:** This is due to the bad crystal quality.

[PLAT910_ALERT_3_B](javascript:makeHelpWindow(%22PLAT910.html%22)) Missing FCF Reflection(s) Below Theta(Min)[Deg]= 3.13 Note

1 1 0, 2 0 0, 3 1 0, 4 0 0, -5 1 1, -3 1 1,

-1 1 1, 1 1 1, 3 1 1, -4 0 2, -3 1 2, -2 0 2,

-1 1 2, 0 0 2, 1 1 2, 2 0 2,

**Response:** The unit cell is reasonable large and these low angle reflections are probably missing due to beamstop. This occurs rather frequently with Mo radiation and our gonoimeter geometry, especially for larger unit cells.


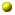
Alert level C

[PLAT026_ALERT_3_C](javascript:makeHelpWindow(%22PLAT026.html%22)) Ratio Observed / Unique Reflections (too) Low .. 40% Check

[PLAT082_ALERT_2_C](javascript:makeHelpWindow(%22PLAT082.html%22)) High R1 Value .................................. 0.11 Report

[PLAT084_ALERT_3_C](javascript:makeHelpWindow(%22PLAT084.html%22)) High wR2 Value (i.e. > 0.25) ................... 0.34 Report

[PLAT220_ALERT_2_C](javascript:makeHelpWindow(%22PLAT220.html%22)) NonSolvent Resd 1 C Ueq(max)/Ueq(min) Range 5.3 Ratio

[PLAT222_ALERT_3_C](javascript:makeHelpWindow(%22PLAT222.html%22)) NonSolvent Resd 1 H Uiso(max)/Uiso(min) Range 5.0 Ratio

[PLAT234_ALERT_4_C](javascript:makeHelpWindow(%22PLAT234.html%22)) Large Hirshfeld Difference C22 --C27 . 0.16 Ang.

[PLAT241_ALERT_2_C](javascript:makeHelpWindow(%22PLAT241.html%22)) High 'MainMol' Ueq as Compared to Neighbors of C41 Check

[PLAT242_ALERT_2_C](javascript:makeHelpWindow(%22PLAT242.html%22)) Low 'MainMol' Ueq as Compared to Neighbors of O4 Check

And 5 other PLAT242 Alerts

More ...

[PLAT244_ALERT_4_C](javascript:makeHelpWindow(%22PLAT244.html%22)) Low 'Solvent' Ueq as Compared to Neighbors of C55 Check

[PLAT260_ALERT_2_C](javascript:makeHelpWindow(%22PLAT260.html%22)) Large Average Ueq of Residue Including Cl4 0.294 Check

[PLAT906_ALERT_3_C](javascript:makeHelpWindow(%22PLAT906.html%22)) Large K Value in the Analysis of Variance ...... 36.567 Check

And 2 other PLAT906 Alerts

More ...

[PLAT911_ALERT_3_C](javascript:makeHelpWindow(%22PLAT911.html%22)) Missing FCF Refl Between Thmin & STh/L= 0.590 89 Report

-5 1 2, 2 0 4, 4 0 4, 2 0 6, 4 0 6, 2 0 8,

4 0 8, 4 0 10, -2 0 14, -11 7 17, -10 0 20, -8 0 20,

-6 0 20, -16 0 22, -14 0 22, -12 0 22, -10 0 22, -8 0 22,

-6 0 22, -4 0 22, -20 0 24, -18 0 24, -16 0 24, -14 0 24,

-12 0 24, -11 1 24, -10 0 24, -9 1 24, -8 0 24, -6 0 24,

( 59 More Missing: see the .ckf listing file)


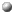
Alert level G

[PLAT002_ALERT_2_G](javascript:makeHelpWindow(%22PLAT002.html%22)) Number of Distance or Angle Restraints on AtSite 18 Note

[PLAT003_ALERT_2_G](javascript:makeHelpWindow(%22PLAT003.html%22)) Number of Uiso or U(i,j) Restrained non-H-Atoms 15 Report

[PLAT128_ALERT_4_G](javascript:makeHelpWindow(%22PLAT128.html%22)) Alternate Setting for Input Space-group C2/c I2/a Note

[PLAT172_ALERT_4_G](javascript:makeHelpWindow(%22PLAT172.html%22)) The CIF-Embedded .res File Contains DFIX Records 4 Report

[PLAT173_ALERT_4_G](javascript:makeHelpWindow(%22PLAT173.html%22)) The CIF-Embedded .res File Contains DANG Records 2 Report

[PLAT177_ALERT_4_G](javascript:makeHelpWindow(%22PLAT177.html%22)) The CIF-Embedded .res File Contains DELU Records 3 Report

[PLAT178_ALERT_4_G](javascript:makeHelpWindow(%22PLAT178.html%22)) The CIF-Embedded .res File Contains SIMU Records 3 Report

[PLAT192_ALERT_3_G](javascript:makeHelpWindow(%22PLAT192.html%22)) A Non-default DELU Restraint Value for First Par 0.0200 Report

And 2 other PLAT192 Alerts

More ...

[PLAT199_ALERT_1_G](javascript:makeHelpWindow(%22PLAT199.html%22)) Reported _cell_measurement_temperature ..... (K) 293 Check

[PLAT200_ALERT_1_G](javascript:makeHelpWindow(%22PLAT200.html%22)) Reported _diffrn_ambient_temperature ..... (K) 293 Check

[PLAT299_ALERT_4_G](javascript:makeHelpWindow(%22PLAT299.html%22)) Atom Site Occupancy Constrained at ............. 0.5 Check

Cl5 C56 H56

[PLAT302_ALERT_4_G](javascript:makeHelpWindow(%22PLAT302.html%22)) Anion/Solvent/Minor-Residue Disorder (Resd 2) 50% Note

[PLAT434_ALERT_2_G](javascript:makeHelpWindow(%22PLAT434.html%22)) Short Inter HL..HL Contact Cl3 ..Cl5 . 3.23 Ang.

1-x,y,3/2-z = 2_656 Check

[PLAT779_ALERT_4_G](javascript:makeHelpWindow(%22PLAT779.html%22)) Suspect or Irrelevant (Bond) Angle(s) in CIF ... 36.80 Deg.

C56 -CL5 -CL4 1_555 1_555 2_656 ...... # 11 Check

[PLAT789_ALERT_4_G](javascript:makeHelpWindow(%22PLAT789.html%22)) Atoms with Negative _atom_site_disorder_group # 2 Check

[PLAT822_ALERT_4_G](javascript:makeHelpWindow(%22PLAT822.html%22)) CIF-embedded .res Contains Negative PART Numbers 1 Check

[PLAT860_ALERT_3_G](javascript:makeHelpWindow(%22PLAT860.html%22)) Number of Least-Squares Restraints ............. 114 Note

[PLAT883_ALERT_1_G](javascript:makeHelpWindow(%22PLAT883.html%22)) Absent Datum for _atom_sites_solution_primary .. Please Do !

[PLAT933_ALERT_2_G](javascript:makeHelpWindow(%22PLAT933.html%22)) Number of HKL-OMIT Records in Embedded .res File 3 Note

-5 1 2, -2 0 14, -5 1 1,

[PLAT941_ALERT_3_G](javascript:makeHelpWindow(%22PLAT941.html%22)) Average HKL Measurement Multiplicity ........... 3.7 Low

[PLAT965_ALERT_2_G](javascript:makeHelpWindow(%22PLAT965.html%22)) The SHELXL WEIGHT Optimisation has not Converged Please Check

[PLAT969_ALERT_5_G](javascript:makeHelpWindow(%22PLAT969.html%22)) The 'Henn et al.' R-Factor-gap value ........... 5.402 Note

Predicted wR2: Based on SigI**2 6.34 or SHELX Weight 27.88

[PLAT978_ALERT_2_G](javascript:makeHelpWindow(%22PLAT978.html%22)) Number C-C Bonds with Positive Residual Density. 0 Info

0 ALERT level A = Most likely a serious problem - resolve or explain

3 ALERT level B = A potentially serious problem, consider carefully

19 ALERT level C = Check. Ensure it is not caused by an omission or oversight

25 ALERT level G = General information/check it is not something unexpected

3 ALERT type 1 CIF construction/syntax error, inconsistent or missing data

17 ALERT type 2 Indicator that the structure model may be wrong or deficient

14 ALERT type 3 Indicator that the structure quality may be low

12 ALERT type 4 Improvement, methodology, query or suggestion

1 ALERT type 5 Informative message, check

| It is advisable to attempt to resolve as many as possible of the alerts in all categories. Often the minor alerts point to easily fixed oversights, errors and omissions in your CIF or refinement strategy, so attention to these fine details can be worthwhile. It is up to the individual to critically assess their own results and, if necessary, seek expert advice. |
| --- |

PLATON version of 26/09/2025; check.def file version of 20/09/2025

duplicate check

No duplication found

|  |
| --- |
|  |
| **checkCIF_ P10_D**  checkCIF (basic structural check) running  *Checking for embedded fcf data in CIF ...* *Found embedded fcf data in CIF. Extracting fcf data from uploaded CIF, please wait*. . . .  checkCIF/PLATON (basic structural check)  Structure factors have been supplied for datablock(s) P10_D  THIS REPORT IS FOR GUIDANCE ONLY. IF USED AS PART OF A REVIEW PROCEDURE FOR PUBLICATION, IT SHOULD NOT REPLACE THE EXPERTISE OF AN EXPERIENCED CRYSTALLOGRAPHIC REFEREE.  No syntax errors found.  [CIF dictionary](https://www.iucr.org/iucr-top/cif/cif_core/definitions/index.html) Please wait while processing .... [Interpreting this report](https://journals.iucr.org/services/cif/checking/checkcifreport.html) [Structure factor report](https://checkcif.iucr.org/06m49OzKKAMxF/100725194604927910799/ckf.html)  Datablock: P10_D   | Bond precision: | C-C = 0.0129 A | Wavelength=0.71075 | | --- | --- | --- |  | Cell: | a=21.690(2) | b=12.8951(14) | c=22.960(2) | | --- | --- | --- | --- | |  | alpha=90 | beta=116.539(8) | gamma=90 | | Temperature: | 293 K |  |  |  |  | Calculated | Reported | | --- | --- | --- | | Volume | 5745.1(10) | 5745.2(11) | | Space group | P 21/c | P 21/c | | Hall group | -P 2ybc | -P 2ybc | | Moiety formula | C56 H68 O10, C6 H12 | ? | | Sum formula | C62 H80 O10 | C62 H80 O10 | | Mr | 985.26 | 985.26 | | Dx,g cm-3 | 1.139 | 1.139 | | Z | 4 | 4 | | Mu (mm-1) | 0.076 | 0.076 | | F000 | 2128.0 | 2128.0 | | F000' | 2129.00 |  | | h,k,lmax | 25,15,27 | 25,15,27 | | Nref | 10108 | 10045 | | Tmin,Tmax | 0.992,0.998 | 0.178,0.998 | | Tmin' | 0.984 |  |  | Correction method= # Reported T Limits: Tmin=0.178 Tmax=0.998 AbsCorr = MULTI-SCAN |  | | --- | --- |  | Data completeness= 0.994 | Theta(max)= 24.995 | | --- | --- |  | R(reflections)= 0.1103( 3132) | wR2(reflections)= 0.3309( 10045) | | --- | --- | | | S = 1.080 | Npar= 656 | | --- | --- | |  |   The following ALERTS were generated. Each ALERT has the format  test-name_ALERT_alert-type_alert-level.  Click on the hyperlinks for more details of the test.  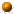Alert level B  [PLAT026_ALERT_3_B](javascript:makeHelpWindow(%22PLAT026.html%22)) Ratio Observed / Unique Reflections (too) Low .. 31% Check  **Respnse:** Due to bad crystal quality, the high resolution reflections were poor. We are confident that the structural characterization is valid.  [PLAT340_ALERT_3_B](javascript:makeHelpWindow(%22PLAT340.html%22)) Low Bond Precision on C-C Bonds ............... 0.01291 Ang.  **Respnse:** This is due to the bad crystal quality.  [PLAT910_ALERT_3_B](javascript:makeHelpWindow(%22PLAT910.html%22)) Missing FCF Reflection(s) Below Theta(Min)[Deg]= 3.06 Note  1 0 0, 1 1 0, 2 0 0, 2 1 0, -2 1 1, -1 1 1,  0 1 1, 1 1 1, -3 0 2, -2 0 2, -2 1 2, -1 0 2,  -1 1 2, 0 0 2, 0 1 2, 1 0 2,  **Response:** The unit cell is reasonable large and these low angle reflections are probably missing due to beamstop. This occurs rather frequently with Mo radiation and our gonoimeter geometry, especially for larger unit cells.    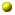Alert level C  [RINTA01_ALERT_3_C](javascript:makeHelpWindow(%22RINTA_01.html%22)) The value of Rint is greater than 0.12  Rint given 0.150  [PLAT020_ALERT_3_C](javascript:makeHelpWindow(%22PLAT020.html%22)) The Value of Rint is Greater Than 0.12 ......... 0.150 Report  [PLAT082_ALERT_2_C](javascript:makeHelpWindow(%22PLAT082.html%22)) High R1 Value .................................. 0.11 Report  [PLAT084_ALERT_3_C](javascript:makeHelpWindow(%22PLAT084.html%22)) High wR2 Value (i.e. > 0.25) ................... 0.33 Report  [PLAT220_ALERT_2_C](javascript:makeHelpWindow(%22PLAT220.html%22)) NonSolvent Resd 1 C Ueq(max)/Ueq(min) Range 5.6 Ratio  [PLAT222_ALERT_3_C](javascript:makeHelpWindow(%22PLAT222.html%22)) NonSolvent Resd 1 H Uiso(max)/Uiso(min) Range 6.7 Ratio  [PLAT234_ALERT_4_C](javascript:makeHelpWindow(%22PLAT234.html%22)) Large Hirshfeld Difference O1 --C36 . 0.16 Ang.  And 6 other PLAT234 Alerts  More ...  [PLAT241_ALERT_2_C](javascript:makeHelpWindow(%22PLAT241.html%22)) High 'MainMol' Ueq as Compared to Neighbors of C21 Check  [PLAT241_ALERT_2_C](javascript:makeHelpWindow(%22PLAT241.html%22)) High 'MainMol' Ueq as Compared to Neighbors of C47 Check  [PLAT242_ALERT_2_C](javascript:makeHelpWindow(%22PLAT242.html%22)) Low 'MainMol' Ueq as Compared to Neighbors of O4 Check  And 2 other PLAT242 Alerts  More ...  [PLAT243_ALERT_4_C](javascript:makeHelpWindow(%22PLAT243.html%22)) High 'Solvent' Ueq as Compared to Neighbors of C58 Check  [PLAT244_ALERT_4_C](javascript:makeHelpWindow(%22PLAT244.html%22)) Low 'Solvent' Ueq as Compared to Neighbors of C60 Check  [PLAT260_ALERT_2_C](javascript:makeHelpWindow(%22PLAT260.html%22)) Large Average Ueq of Residue Including O1 0.119 Check  [PLAT260_ALERT_2_C](javascript:makeHelpWindow(%22PLAT260.html%22)) Large Average Ueq of Residue Including C57 0.244 Check  [PLAT360_ALERT_2_C](javascript:makeHelpWindow(%22PLAT360.html%22)) Short C(sp3)-C(sp3) Bond C57 - C62 . 1.42 Ang.  And 2 other PLAT360 Alerts  More ...  [PLAT372_ALERT_2_C](javascript:makeHelpWindow(%22PLAT372.html%22)) Short C(sp)-C(sp) Bond C37 - C38 . 1.14 Ang.  [PLAT413_ALERT_2_C](javascript:makeHelpWindow(%22PLAT413.html%22)) Short Inter XH3 .. XHn H50C ..H56C . 2.14 Ang.  2-x,2-y,2-z = 3_777 Check  [PLAT601_ALERT_2_C](javascript:makeHelpWindow(%22PLAT601.html%22)) Unit-Cell Contains Solvent Accessible VOIDS .LE. 40 Ang**3  [PLAT906_ALERT_3_C](javascript:makeHelpWindow(%22PLAT906.html%22)) Large K Value in the Analysis of Variance ...... 104.605 Check  And 6 other PLAT906 Alerts  More ...  [PLAT911_ALERT_3_C](javascript:makeHelpWindow(%22PLAT911.html%22)) Missing FCF Refl Between Thmin & STh/L= 0.594 47 Report  -5 15 1, 6 2 1, 17 10 1, -22 6 2, 16 10 3, -5 15 4,  14 11 4, -4 15 5, 0 15 5, -25 0 6, -16 12 7, -16 12 8,  14 9 8, 16 7 8, 16 6 9, -13 13 10, -6 14 11, -4 14 11,  -14 12 14, -9 13 14, -3 13 14, -13 12 15, -2 12 16, 0 11 17,  -20 8 18, 1 10 18, 8 5 18, -8 11 19, -20 7 20, -4 10 20,  ( 17 More Missing: see the .ckf listing file)  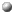Alert level G  [PLAT002_ALERT_2_G](javascript:makeHelpWindow(%22PLAT002.html%22)) Number of Distance or Angle Restraints on AtSite 14 Note  [PLAT003_ALERT_2_G](javascript:makeHelpWindow(%22PLAT003.html%22)) Number of Uiso or U(i,j) Restrained non-H-Atoms 11 Report  [PLAT172_ALERT_4_G](javascript:makeHelpWindow(%22PLAT172.html%22)) The CIF-Embedded .res File Contains DFIX Records 2 Report  [PLAT173_ALERT_4_G](javascript:makeHelpWindow(%22PLAT173.html%22)) The CIF-Embedded .res File Contains DANG Records 2 Report  [PLAT177_ALERT_4_G](javascript:makeHelpWindow(%22PLAT177.html%22)) The CIF-Embedded .res File Contains DELU Records 2 Report  [PLAT178_ALERT_4_G](javascript:makeHelpWindow(%22PLAT178.html%22)) The CIF-Embedded .res File Contains SIMU Records 2 Report  [PLAT188_ALERT_3_G](javascript:makeHelpWindow(%22PLAT188.html%22)) A Non-default SIMU Restraint Value has been used 0.0100 Report  [PLAT188_ALERT_3_G](javascript:makeHelpWindow(%22PLAT188.html%22)) A Non-default SIMU Restraint Value has been used 0.0100 Report  [PLAT199_ALERT_1_G](javascript:makeHelpWindow(%22PLAT199.html%22)) Reported _cell_measurement_temperature ..... (K) 293 Check  [PLAT200_ALERT_1_G](javascript:makeHelpWindow(%22PLAT200.html%22)) Reported _diffrn_ambient_temperature ..... (K) 293 Check  [PLAT790_ALERT_4_G](javascript:makeHelpWindow(%22PLAT790.html%22)) Centre of Gravity not Within Unit-Cell: Resd. # 2 Note  C6 H12  [PLAT860_ALERT_3_G](javascript:makeHelpWindow(%22PLAT860.html%22)) Number of Least-Squares Restraints ............. 101 Note  [PLAT883_ALERT_1_G](javascript:makeHelpWindow(%22PLAT883.html%22)) Absent Datum for _atom_sites_solution_primary .. Please Do !  [PLAT933_ALERT_2_G](javascript:makeHelpWindow(%22PLAT933.html%22)) Number of HKL-OMIT Records in Embedded .res File 1 Note  6 2 1,  [PLAT941_ALERT_3_G](javascript:makeHelpWindow(%22PLAT941.html%22)) Average HKL Measurement Multiplicity ........... 3.8 Low  [PLAT965_ALERT_2_G](javascript:makeHelpWindow(%22PLAT965.html%22)) The SHELXL WEIGHT Optimisation has not Converged Please Check  [PLAT969_ALERT_5_G](javascript:makeHelpWindow(%22PLAT969.html%22)) The 'Henn et al.' R-Factor-gap value ........... 3.771 Note  Predicted wR2: Based on SigI**2 8.78 or SHELX Weight 30.64  [PLAT978_ALERT_2_G](javascript:makeHelpWindow(%22PLAT978.html%22)) Number C-C Bonds with Positive Residual Density. 0 Info  0 ALERT level A = Most likely a serious problem - resolve or explain  3 ALERT level B = A potentially serious problem, consider carefully  36 ALERT level C = Check. Ensure it is not caused by an omission or oversight  18 ALERT level G = General information/check it is not something unexpected  3 ALERT type 1 CIF construction/syntax error, inconsistent or missing data  20 ALERT type 2 Indicator that the structure model may be wrong or deficient  19 ALERT type 3 Indicator that the structure quality may be low  14 ALERT type 4 Improvement, methodology, query or suggestion  1 ALERT type 5 Informative message, check   | It is advisable to attempt to resolve as many as possible of the alerts in all categories. Often the minor alerts point to easily fixed oversights, errors and omissions in your CIF or refinement strategy, so attention to these fine details can be worthwhile. It is up to the individual to critically assess their own results and, if necessary, seek expert advice. | | --- |   PLATON version of 26/09/2025; check.def file version of 20/09/2025  duplicate check  No duplication found   |  | | --- | |  | |

**checkCIF_ P8_ADN**

checkCIF (basic structural check) running

*Checking for embedded fcf data in CIF ...*
*Found embedded fcf data in CIF. Extracting fcf data from uploaded CIF, please wait*. . . .

checkCIF/PLATON (basic structural check)

Structure factors have been supplied for datablock(s) P8_ADN

THIS REPORT IS FOR GUIDANCE ONLY. IF USED AS PART OF A REVIEW PROCEDURE FOR PUBLICATION, IT SHOULD NOT REPLACE THE EXPERTISE OF AN EXPERIENCED CRYSTALLOGRAPHIC REFEREE.

No syntax errors found.

[CIF dictionary](https://www.iucr.org/iucr-top/cif/cif_core/definitions/index.html) Please wait while processing .... [Interpreting this report](https://journals.iucr.org/services/cif/checking/checkcifreport.html)m[Structure factor report](https://checkcif.iucr.org/9rS6MBdoTnJTk/100725193602554610599/ckf.html)

Datablock: P8_ADN

| Bond precision: | C-C = 0.0111 A | Wavelength=0.71075 |
| --- | --- | --- |

| Cell: | a=12.1153(6) | b=12.4294(7) | c=37.2417(19) |
| --- | --- | --- | --- |
|  | alpha=90 | beta=90.735(6) | gamma=90 |
| Temperature: | 293 K |  |  |

|  | Calculated | Reported |
| --- | --- | --- |
| Volume | 5607.6(5) | 5607.6(5) |
| Space group | P 21/n | P 21/n |
| Hall group | -P 2yn | -P 2yn |
| Moiety formula | C54 H64 O10, C6 H8 N2 | ? |
| Sum formula | C60 H72 N2 O10 | C60 H72 N2 O10 |
| Mr | 981.20 | 981.19 |
| Dx,g cm-3 | 1.162 | 1.162 |
| Z | 4 | 4 |
| Mu (mm-1) | 0.078 | 0.078 |
| F000 | 2104.0 | 2104.0 |
| F000' | 2104.99 |  |
| h,k,lmax | 14,14,44 | 14,14,44 |
| Nref | 9924 | 9866 |
| Tmin,Tmax | 0.985,0.997 | 0.698,0.982 |
| Tmin' | 0.985 |  |

| Correction method= # Reported T Limits: Tmin=0.698 Tmax=0.982 AbsCorr = MULTI-SCAN |  |
| --- | --- |

| Data completeness= 0.994 | Theta(max)= 25.024 |
| --- | --- |

| R(reflections)= 0.1084( 4515) | wR2(reflections)= 0.3417( 9866) |
| --- | --- |
| | S = 0.954 | Npar= 658 | | --- | --- | |  |

The following ALERTS were generated. Each ALERT has the format

test-name_ALERT_alert-type_alert-level.

Click on the hyperlinks for more details of the test.


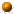
Alert level B

[PLAT260_ALERT_2_B](javascript:makeHelpWindow(%22PLAT260.html%22)) Large Average Ueq of Residue Including N1 0.339 Check

**Response:** Due to bad crystal quality, the encapsulated adiponitrile peaks are not well refined.

[PLAT340_ALERT_3_B](javascript:makeHelpWindow(%22PLAT340.html%22)) Low Bond Precision on C-C Bonds ............... 0.01106 Ang.

**Respnse:** This is due to the bad crystal quality.

[PLAT910_ALERT_3_B](javascript:makeHelpWindow(%22PLAT910.html%22)) Missing FCF Reflection(s) Below Theta(Min)[Deg]= 3.19 Note

1 1 0, -1 0 1, 1 0 1, -1 1 1, 0 1 1, 1 1 1,

0 0 2, -1 1 2, 0 1 2, 1 1 2, -1 0 3, 1 0 3,

-1 1 3, 0 1 3, 1 1 3, 0 0 4, 0 1 4,

**Response:** The unit cell is reasonable large and these low angle reflections are probably missing due to beamstop. This occurs rather frequently with Mo radiation and our gonoimeter geometry, especially for larger unit cells.


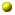
Alert level C

[PLAT026_ALERT_3_C](javascript:makeHelpWindow(%22PLAT026.html%22)) Ratio Observed / Unique Reflections (too) Low .. 46% Check

[PLAT082_ALERT_2_C](javascript:makeHelpWindow(%22PLAT082.html%22)) High R1 Value .................................. 0.11 Report

[PLAT084_ALERT_3_C](javascript:makeHelpWindow(%22PLAT084.html%22)) High wR2 Value (i.e. > 0.25) ................... 0.34 Report

[PLAT220_ALERT_2_C](javascript:makeHelpWindow(%22PLAT220.html%22)) NonSolvent Resd 1 C Ueq(max)/Ueq(min) Range 5.6 Ratio

[PLAT222_ALERT_3_C](javascript:makeHelpWindow(%22PLAT222.html%22)) NonSolvent Resd 1 H Uiso(max)/Uiso(min) Range 6.9 Ratio

[PLAT230_ALERT_2_C](javascript:makeHelpWindow(%22PLAT230.html%22)) Hirshfeld Test Diff for O1 --C36 . 5.7 s.u.

[PLAT230_ALERT_2_C](javascript:makeHelpWindow(%22PLAT230.html%22)) Hirshfeld Test Diff for C17 --C18 . 5.6 s.u.

[PLAT234_ALERT_4_C](javascript:makeHelpWindow(%22PLAT234.html%22)) Large Hirshfeld Difference O10 --C54 . 0.18 Ang.

And 2 other PLAT234 Alerts

More ...

[PLAT241_ALERT_2_C](javascript:makeHelpWindow(%22PLAT241.html%22)) High 'MainMol' Ueq as Compared to Neighbors of C40 Check

[PLAT241_ALERT_2_C](javascript:makeHelpWindow(%22PLAT241.html%22)) High 'MainMol' Ueq as Compared to Neighbors of C41 Check

[PLAT242_ALERT_2_C](javascript:makeHelpWindow(%22PLAT242.html%22)) Low 'MainMol' Ueq as Compared to Neighbors of O2 Check

And 2 other PLAT242 Alerts

More ...

[PLAT244_ALERT_4_C](javascript:makeHelpWindow(%22PLAT244.html%22)) Low 'Solvent' Ueq as Compared to Neighbors of C55 Check

[PLAT244_ALERT_4_C](javascript:makeHelpWindow(%22PLAT244.html%22)) Low 'Solvent' Ueq as Compared to Neighbors of C60 Check

[PLAT250_ALERT_2_C](javascript:makeHelpWindow(%22PLAT250.html%22)) Large U3/U1 Ratio for <U(i,j)> Tensor(Resd 2) 2.7 Note

[PLAT260_ALERT_2_C](javascript:makeHelpWindow(%22PLAT260.html%22)) Large Average Ueq of Residue Including O1 0.158 Check

[PLAT410_ALERT_2_C](javascript:makeHelpWindow(%22PLAT410.html%22)) Short Intra H...H Contact H42B ..H44B . 1.98 Ang.

x,y,z = 1_555 Check

[PLAT410_ALERT_2_C](javascript:makeHelpWindow(%22PLAT410.html%22)) Short Intra H...H Contact H43B ..H45A . 1.98 Ang.

x,y,z = 1_555 Check

[PLAT906_ALERT_3_C](javascript:makeHelpWindow(%22PLAT906.html%22)) Large K Value in the Analysis of Variance ...... 33.455 Check

And 2 other PLAT906 Alerts

More ...

[PLAT911_ALERT_3_C](javascript:makeHelpWindow(%22PLAT911.html%22)) Missing FCF Refl Between Thmin & STh/L= 0.595 41 Report

2 0 0, 4 5 0, -3 2 3, -2 2 3, 14 3 5, -14 3 6,

13 6 6, 1 4 7, 14 0 8, 14 2 8, 14 1 9, -14 2 9,

11 9 9, 14 0 10, -2 14 13, -1 14 14, 13 3 16, 9 10 17,

12 5 19, 11 7 19, 12 0 24, 11 5 24, 10 6 26, 11 1 28,

8 7 30, -10 3 31, 9 4 32, 2 10 32, 9 3 33, -8 5 34,

( 11 More Missing: see the .ckf listing file)

[PLAT918_ALERT_3_C](javascript:makeHelpWindow(%22PLAT918.html%22)) Reflection(s) with I(obs) much Smaller I(calc) . 6 Check

2 1 0, 3 0 1, -2 0 4, -1 0 5, -1 1 7, 1 1 7,

[PLAT977_ALERT_2_C](javascript:makeHelpWindow(%22PLAT977.html%22)) Check Negative Difference Density on H41B . -0.33 eA-3


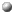
Alert level G

[PLAT002_ALERT_2_G](javascript:makeHelpWindow(%22PLAT002.html%22)) Number of Distance or Angle Restraints on AtSite 19 Note

[PLAT003_ALERT_2_G](javascript:makeHelpWindow(%22PLAT003.html%22)) Number of Uiso or U(i,j) Restrained non-H-Atoms 21 Report

[PLAT083_ALERT_2_G](javascript:makeHelpWindow(%22PLAT083.html%22)) SHELXL Second Parameter in WGHT Unusually Large 5.35 Why ?

[PLAT172_ALERT_4_G](javascript:makeHelpWindow(%22PLAT172.html%22)) The CIF-Embedded .res File Contains DFIX Records 4 Report

[PLAT173_ALERT_4_G](javascript:makeHelpWindow(%22PLAT173.html%22)) The CIF-Embedded .res File Contains DANG Records 4 Report

[PLAT177_ALERT_4_G](javascript:makeHelpWindow(%22PLAT177.html%22)) The CIF-Embedded .res File Contains DELU Records 3 Report

[PLAT178_ALERT_4_G](javascript:makeHelpWindow(%22PLAT178.html%22)) The CIF-Embedded .res File Contains SIMU Records 3 Report

[PLAT188_ALERT_3_G](javascript:makeHelpWindow(%22PLAT188.html%22)) A Non-default SIMU Restraint Value has been used 0.0100 Report

And 2 other PLAT188 Alerts

More ...

[PLAT199_ALERT_1_G](javascript:makeHelpWindow(%22PLAT199.html%22)) Reported _cell_measurement_temperature ..... (K) 293 Check

[PLAT200_ALERT_1_G](javascript:makeHelpWindow(%22PLAT200.html%22)) Reported _diffrn_ambient_temperature ..... (K) 293 Check

[PLAT343_ALERT_2_G](javascript:makeHelpWindow(%22PLAT343.html%22)) Unusual sp? Angle Range in Main Residue for C37 Check

[PLAT344_ALERT_2_G](javascript:makeHelpWindow(%22PLAT344.html%22)) Unusual sp? Angle Range in Solvent/Ion for C60 Check

[PLAT367_ALERT_2_G](javascript:makeHelpWindow(%22PLAT367.html%22)) Long? C(sp?)-C(sp?) Bond C59 - C60 . 1.55 Ang.

[PLAT432_ALERT_2_G](javascript:makeHelpWindow(%22PLAT432.html%22)) Short Inter X...Y Contact N1 ..C38 . 2.94 Ang.

x,y,z = 1_555 Check

[PLAT860_ALERT_3_G](javascript:makeHelpWindow(%22PLAT860.html%22)) Number of Least-Squares Restraints ............. 166 Note

[PLAT883_ALERT_1_G](javascript:makeHelpWindow(%22PLAT883.html%22)) Absent Datum for _atom_sites_solution_primary .. Please Do !

[PLAT933_ALERT_2_G](javascript:makeHelpWindow(%22PLAT933.html%22)) Number of HKL-OMIT Records in Embedded .res File 5 Note

2 0 0, 4 5 0, -3 2 3, -2 2 3, 1 4 7,

[PLAT965_ALERT_2_G](javascript:makeHelpWindow(%22PLAT965.html%22)) The SHELXL WEIGHT Optimisation has not Converged Please Check

[PLAT969_ALERT_5_G](javascript:makeHelpWindow(%22PLAT969.html%22)) The 'Henn et al.' R-Factor-gap value ........... 6.910 Note

Predicted wR2: Based on SigI**2 4.95 or SHELX Weight 35.81

[PLAT978_ALERT_2_G](javascript:makeHelpWindow(%22PLAT978.html%22)) Number C-C Bonds with Positive Residual Density. 1 Info

0 ALERT level A = Most likely a serious problem - resolve or explain

3 ALERT level B = A potentially serious problem, consider carefully

27 ALERT level C = Check. Ensure it is not caused by an omission or oversight

22 ALERT level G = General information/check it is not something unexpected

3 ALERT type 1 CIF construction/syntax error, inconsistent or missing data

25 ALERT type 2 Indicator that the structure model may be wrong or deficient

14 ALERT type 3 Indicator that the structure quality may be low

9 ALERT type 4 Improvement, methodology, query or suggestion

1 ALERT type 5 Informative message, check

| It is advisable to attempt to resolve as many as possible of the alerts in all categories. Often the minor alerts point to easily fixed oversights, errors and omissions in your CIF or refinement strategy, so attention to these fine details can be worthwhile. It is up to the individual to critically assess their own results and, if necessary, seek expert advice. |
| --- |

PLATON version of 26/09/2025; check.def file version of 20/09/2025

duplicate check

No duplication found

|  |
| --- |
| **checkCIF_ P10.ADN**  checkCIF (basic structural check) running  *Checking for embedded fcf data in CIF ...* *Found embedded fcf data in CIF. Extracting fcf data from uploaded CIF, please wait*. . .  checkCIF/PLATON (basic structural check)  Structure factors have been supplied for datablock(s) P10_ADN  THIS REPORT IS FOR GUIDANCE ONLY. IF USED AS PART OF A REVIEW PROCEDURE FOR PUBLICATION, IT SHOULD NOT REPLACE THE EXPERTISE OF AN EXPERIENCED CRYSTALLOGRAPHIC REFEREE.  No syntax errors found.  [CIF dictionary](https://www.iucr.org/iucr-top/cif/cif_core/definitions/index.html) Please wait while processing .... [Interpreting this report](https://journals.iucr.org/services/cif/checking/checkcifreport.html) [Structure factor report](https://checkcif.iucr.org/Nrna3PWw41b2m/100725194451906581820/ckf.html)  Datablock: P10_ADN   | Bond precision: | C-C = 0.0124 A | Wavelength=0.71075 | | --- | --- | --- |  | Cell: | a=11.2701(12) | b=12.0419(13) | c=24.328(3) | | --- | --- | --- | --- | |  | alpha=76.594(5) | beta=89.067(6) | gamma=63.961(5) | | Temperature: | 293 K |  |  |  |  | Calculated | Reported | | --- | --- | --- | | Volume | 2871.8(6) | 2871.8(6) | | Space group | P -1 | P -1 | | Hall group | -P 1 | -P 1 | | Moiety formula | C56 H68 O10, C6 H8 N2 | ? | | Sum formula | C62 H76 N2 O10 | C62 H76 N2 O10 | | Mr | 1009.25 | 1009.24 | | Dx,g cm-3 | 1.167 | 1.167 | | Z | 2 | 2 | | Mu (mm-1) | 0.078 | 0.078 | | F000 | 1084.0 | 1084.0 | | F000' | 1084.51 |  | | h,k,lmax | 13,14,28 | 13,14,28 | | Nref | 10143 | 9772 | | Tmin,Tmax | 0.994,0.997 | 0.149,0.997 | | Tmin' | 0.985 |  |  | Correction method= # Reported T Limits: Tmin=0.149 Tmax=0.997 AbsCorr = MULTI-SCAN |  | | --- | --- |  | Data completeness= 0.963 | Theta(max)= 25.014 | | --- | --- |  | R(reflections)= 0.1073( 3255) | wR2(reflections)= 0.3491( 9772) | | --- | --- | | | S = 1.040 | Npar= 676 | | --- | --- | |  |   The following ALERTS were generated. Each ALERT has the format  test-name_ALERT_alert-type_alert-level.  Click on the hyperlinks for more details of the test.  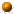Alert level B  [PLAT026_ALERT_3_B](javascript:makeHelpWindow(%22PLAT026.html%22)) Ratio Observed / Unique Reflections (too) Low .. 33% Check  **Respnse:** Due to bad crystal quality, the high resolution reflections were poor. We are confident that the structural characterization is valid.  [PLAT340_ALERT_3_B](javascript:makeHelpWindow(%22PLAT340.html%22)) Low Bond Precision on C-C Bonds ............... 0.01239 Ang.  **Respnse:** This is due to the bad crystal quality.  [PLAT910_ALERT_3_B](javascript:makeHelpWindow(%22PLAT910.html%22)) Missing FCF Reflection(s) Below Theta(Min)[Deg]= 3.10 Note  1 0 0, 0 1 0, 1 1 0, -1 -1 1, 0 -1 1, -1 0 1,  0 0 1, 1 0 1, 0 1 1, 1 1 1, -1 -1 2, 0 -1 2,  -1 0 2, 0 0 2, 1 0 2, 0 1 2, 1 1 2, 0 0 3,  0 1 3,  **Response:** The unit cell is reasonable large and these low angle reflections are probably missing due to beamstop. This occurs rather frequently with Mo radiation and our gonoimeter geometry, especially for larger unit cells.    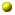Alert level C  [PLAT029_ALERT_3_C](javascript:makeHelpWindow(%22PLAT029.html%22)) _diffrn_measured_fraction_theta_full value Low . 0.963 Why?  [PLAT082_ALERT_2_C](javascript:makeHelpWindow(%22PLAT082.html%22)) High R1 Value .................................. 0.11 Report  [PLAT084_ALERT_3_C](javascript:makeHelpWindow(%22PLAT084.html%22)) High wR2 Value (i.e. > 0.25) ................... 0.35 Report  [PLAT220_ALERT_2_C](javascript:makeHelpWindow(%22PLAT220.html%22)) NonSolvent Resd 1 C Ueq(max)/Ueq(min) Range 5.7 Ratio  [PLAT222_ALERT_3_C](javascript:makeHelpWindow(%22PLAT222.html%22)) NonSolvent Resd 1 H Uiso(max)/Uiso(min) Range 6.1 Ratio  [PLAT234_ALERT_4_C](javascript:makeHelpWindow(%22PLAT234.html%22)) Large Hirshfeld Difference O6 --C52 . 0.21 Ang.  And 4 other PLAT234 Alerts  More ...  [PLAT241_ALERT_2_C](javascript:makeHelpWindow(%22PLAT241.html%22)) High 'MainMol' Ueq as Compared to Neighbors of O1 Check  And 3 other PLAT241 Alerts  More ...  [PLAT242_ALERT_2_C](javascript:makeHelpWindow(%22PLAT242.html%22)) Low 'MainMol' Ueq as Compared to Neighbors of O6 Check  And 5 other PLAT242 Alerts  More ...  [PLAT243_ALERT_4_C](javascript:makeHelpWindow(%22PLAT243.html%22)) High 'Solvent' Ueq as Compared to Neighbors of C58 Check  [PLAT244_ALERT_4_C](javascript:makeHelpWindow(%22PLAT244.html%22)) Low 'Solvent' Ueq as Compared to Neighbors of C57 Check  [PLAT250_ALERT_2_C](javascript:makeHelpWindow(%22PLAT250.html%22)) Large U3/U1 Ratio for <U(i,j)> Tensor(Resd 2) 2.3 Note  [PLAT260_ALERT_2_C](javascript:makeHelpWindow(%22PLAT260.html%22)) Large Average Ueq of Residue Including O1 0.121 Check  [PLAT260_ALERT_2_C](javascript:makeHelpWindow(%22PLAT260.html%22)) Large Average Ueq of Residue Including N1 0.257 Check  [PLAT372_ALERT_2_C](javascript:makeHelpWindow(%22PLAT372.html%22)) Short C(sp)-C(sp) Bond C37 - C38 . 1.13 Ang.  [PLAT410_ALERT_2_C](javascript:makeHelpWindow(%22PLAT410.html%22)) Short Intra H...H Contact H45A ..H47B . 1.91 Ang.  x,y,z = 1_555 Check  [PLAT906_ALERT_3_C](javascript:makeHelpWindow(%22PLAT906.html%22)) Large K Value in the Analysis of Variance ...... 72.082 Check  And 4 other PLAT906 Alerts  More ...  [PLAT911_ALERT_3_C](javascript:makeHelpWindow(%22PLAT911.html%22)) Missing FCF Refl Between Thmin & STh/L= 0.595 353 Report  -11 1 0, -10 1 0, 12 1 0, -11 2 0, -7 4 0, -7 5 0,  -8 6 0, -7 6 0, -7 7 0, -6 8 0, -5 9 0, 5 -9 1,  6 -8 1, 7 -7 1, -5 -5 1, -12 -1 1, 11 -1 1, -12 0 1,  -11 1 1, -2 1 1, 12 1 1, -11 2 1, -6 3 1, -7 4 1,  -6 4 1, -7 5 1, -6 5 1, -8 6 1, -7 6 1, -7 7 1,  ( 323 More Missing: see the .ckf listing file)  [PLAT918_ALERT_3_C](javascript:makeHelpWindow(%22PLAT918.html%22)) Reflection(s) with I(obs) much Smaller I(calc) . 1 Check  -3 3 4,  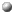Alert level G  [PLAT002_ALERT_2_G](javascript:makeHelpWindow(%22PLAT002.html%22)) Number of Distance or Angle Restraints on AtSite 13 Note  [PLAT003_ALERT_2_G](javascript:makeHelpWindow(%22PLAT003.html%22)) Number of Uiso or U(i,j) Restrained non-H-Atoms 18 Report  [PLAT172_ALERT_4_G](javascript:makeHelpWindow(%22PLAT172.html%22)) The CIF-Embedded .res File Contains DFIX Records 2 Report  [PLAT173_ALERT_4_G](javascript:makeHelpWindow(%22PLAT173.html%22)) The CIF-Embedded .res File Contains DANG Records 2 Report  [PLAT177_ALERT_4_G](javascript:makeHelpWindow(%22PLAT177.html%22)) The CIF-Embedded .res File Contains DELU Records 2 Report  [PLAT178_ALERT_4_G](javascript:makeHelpWindow(%22PLAT178.html%22)) The CIF-Embedded .res File Contains SIMU Records 2 Report  [PLAT188_ALERT_3_G](javascript:makeHelpWindow(%22PLAT188.html%22)) A Non-default SIMU Restraint Value has been used 0.0200 Report  [PLAT188_ALERT_3_G](javascript:makeHelpWindow(%22PLAT188.html%22)) A Non-default SIMU Restraint Value has been used 0.0200 Report  [PLAT199_ALERT_1_G](javascript:makeHelpWindow(%22PLAT199.html%22)) Reported _cell_measurement_temperature ..... (K) 293 Check  [PLAT200_ALERT_1_G](javascript:makeHelpWindow(%22PLAT200.html%22)) Reported _diffrn_ambient_temperature ..... (K) 293 Check  [PLAT344_ALERT_2_G](javascript:makeHelpWindow(%22PLAT344.html%22)) Unusual sp? Angle Range in Solvent/Ion for C57 Check  [PLAT344_ALERT_2_G](javascript:makeHelpWindow(%22PLAT344.html%22)) Unusual sp? Angle Range in Solvent/Ion for C62 Check  [PLAT367_ALERT_2_G](javascript:makeHelpWindow(%22PLAT367.html%22)) Long? C(sp?)-C(sp?) Bond C57 - C58 . 1.52 Ang.  [PLAT367_ALERT_2_G](javascript:makeHelpWindow(%22PLAT367.html%22)) Long? C(sp?)-C(sp?) Bond C61 - C62 . 1.52 Ang.  [PLAT860_ALERT_3_G](javascript:makeHelpWindow(%22PLAT860.html%22)) Number of Least-Squares Restraints ............. 146 Note  [PLAT883_ALERT_1_G](javascript:makeHelpWindow(%22PLAT883.html%22)) Absent Datum for _atom_sites_solution_primary .. Please Do !  [PLAT941_ALERT_3_G](javascript:makeHelpWindow(%22PLAT941.html%22)) Average HKL Measurement Multiplicity ........... 2.3 Low  [PLAT965_ALERT_2_G](javascript:makeHelpWindow(%22PLAT965.html%22)) The SHELXL WEIGHT Optimisation has not Converged Please Check  [PLAT969_ALERT_5_G](javascript:makeHelpWindow(%22PLAT969.html%22)) The 'Henn et al.' R-Factor-gap value ........... 5.606 Note  Predicted wR2: Based on SigI**2 6.23 or SHELX Weight 33.55  [PLAT978_ALERT_2_G](javascript:makeHelpWindow(%22PLAT978.html%22)) Number C-C Bonds with Positive Residual Density. 1 Info  0 ALERT level A = Most likely a serious problem - resolve or explain  3 ALERT level B = A potentially serious problem, consider carefully  34 ALERT level C = Check. Ensure it is not caused by an omission or oversight  20 ALERT level G = General information/check it is not something unexpected  3 ALERT type 1 CIF construction/syntax error, inconsistent or missing data  25 ALERT type 2 Indicator that the structure model may be wrong or deficient  17 ALERT type 3 Indicator that the structure quality may be low  11 ALERT type 4 Improvement, methodology, query or suggestion  1 ALERT type 5 Informative message, check   | It is advisable to attempt to resolve as many as possible of the alerts in all categories. Often the minor alerts point to easily fixed oversights, errors and omissions in your CIF or refinement strategy, so attention to these fine details can be worthwhile. It is up to the individual to critically assess their own results and, if necessary, seek expert advice. | | --- |   PLATON version of 26/09/2025; check.def file version of 20/09/2025  duplicate check  No duplication found   | Datablock P10_ADN - ellipsoid plot | | --- | |
